# Supplementary material for: Dissection of the module network implementation “LemonTree”: enhancements towards applications in metagenomics and translation in autoimmune maladies
Source: Royal Society of Chemistry journal article supplement (doi:10.1039/c7mb00248c), 2017-07-26
Supplement: c7mb00248c1.pdf [file c7mb00248c1.pdf]

## Synthetic data generation and quality check

### 1. SynTReN parameter settings

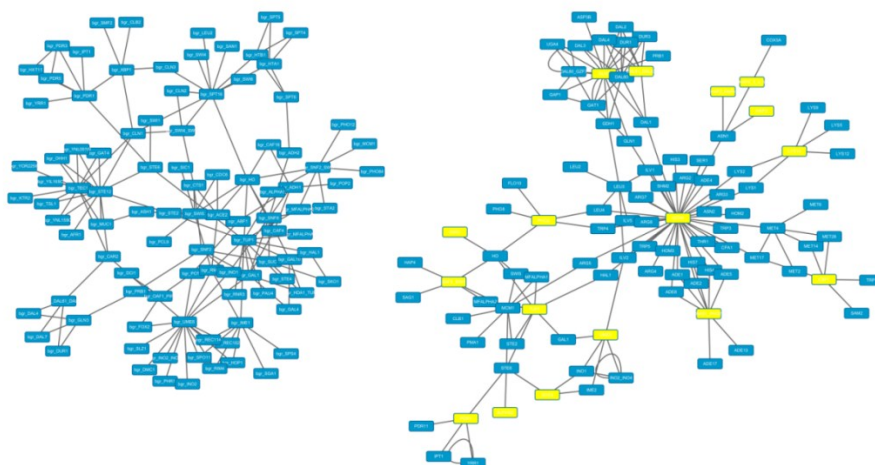

**Fig S1-1.** SynTReN simulated gene networks (*background* left, *foreground* right) and true regulators. True regulators are highlighted in yellow and listed in Table S1-1.

**Table S1-1.** True regulators of the synthetic data (yeast gene regulatory network).

|             |
|-------------|
| LYS14       |
| GCN4        |
| DAL81_DAL82 |
| GLN3        |
| BAS1_PHO2   |
| CBF1        |
| PDR1        |
| PHO2        |
| SDS3        |
| ALPHA2      |
| SNF2_SWI1   |
| HAP3        |
| SWI3        |
| TUP1        |
| UME6        |
| HAP2_HAP4   |
| HAP2_3_4_5  |

**Table S1-2. SynTReN settings for the synthetic data generation.**

| Parameter                                       | Acronym            | Range              |
|-------------------------------------------------|--------------------|--------------------|
| number of replicates in each experimental group | <i>n</i> group     | 5                  |
| number of replicates per group                  | <i>n</i> replicate | 2,10,20,50,100     |
| biological noise level in gene expressions      | <i>bn</i>          | 0.1, 0.2, 0.3, 1.0 |
| <i>foreground</i> gene number                   | -                  | 100                |
| <i>background</i> gene number                   | -                  | 100                |
| true regulator number                           | -                  | 17                 |

## 2. Quality check

AR (average correlation) is defined as the Pearson correlation coefficient (PCC) of the expressions across samples  $E_{g_i}$  and the sample-wise average expressions  $\bar{E}$ , where

$$E_g = (E_{g1}, E_{g2}, \dots, E_{gS}), S \text{ is the sample size, } \bar{E} = (E_1, E_2, \dots, E_S), E_s = \frac{1}{G} \sum_g E_{gs}, G \text{ is gene number.}$$

First, we tested the coexpression levels of the *foreground* using AR (Fig S1-2). Generally the *foreground* exhibits positive ARs, which fades gradually as the biological noise level rises. In comparison, the *background* genes do not show AR significantly deviating from zero. We hence regarded the *foreground* regulated genes as a single module and the *background* as false regulators.

Second, we checked noise levels of the *background* and *foreground* using the coefficient of variance (CV). As shown Fig S1-3, both have increased CVs as noise level rises. Specifically, in *foreground* (Fig S1-3A), the monotony of the CV-noise increment is restricted to the same *n*replicate group (e.g. *n*replicate = 20 or 100), and not preserved across multiple *n*replicate groups; this is on the contrary to CVs in *background* (Fig S1-3B). This reflects SynTReN's limitation in controlling appropriately the *foreground* noise across different replicate groups. We also observed that the CVs of true regulators do not increase in correspondence to the noise levels as specified across *n*replicate groups (Fig S1-4). These limitations reflect the fact that SynTReN cannot fully control expression noise, which may explain our observation of a few exceptions in comparisons of LemonTree performances when we varied replicate numbers or noise levels. Despite these limitations, our AR/CV profiling of the synthetic data confirms that this data simulator does offer a level of control on correlated input to output and hence warrants to be a reasonable LemonTree benchmark.

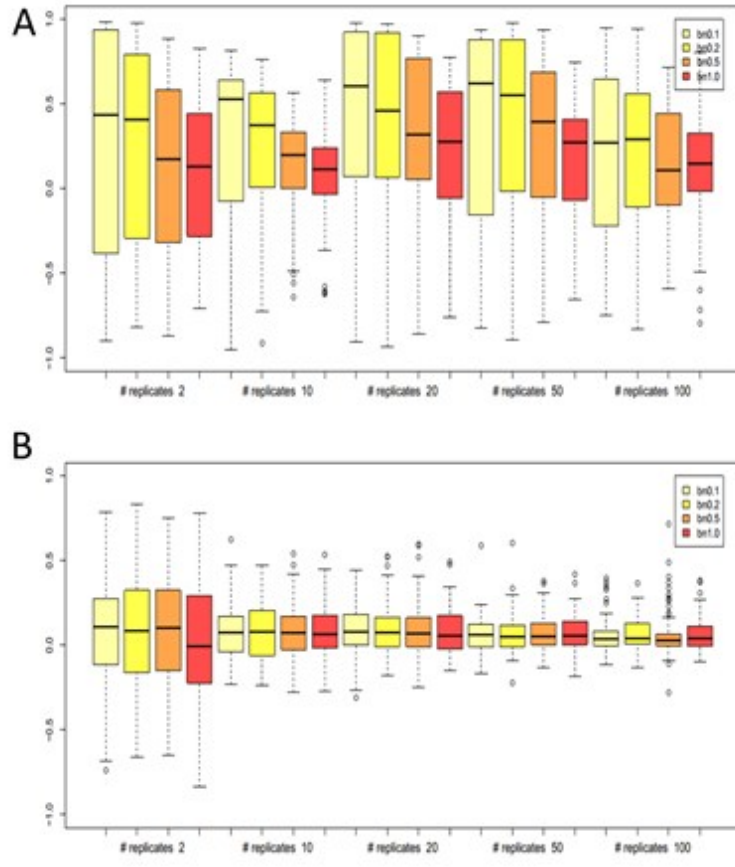

Fig S1-2. ARs of the *foreground* and *background* networks. (A) *foreground*. (B) *background*. x-axis  $n_{replicate}$ , y-axis AR, colors  $bn$ .

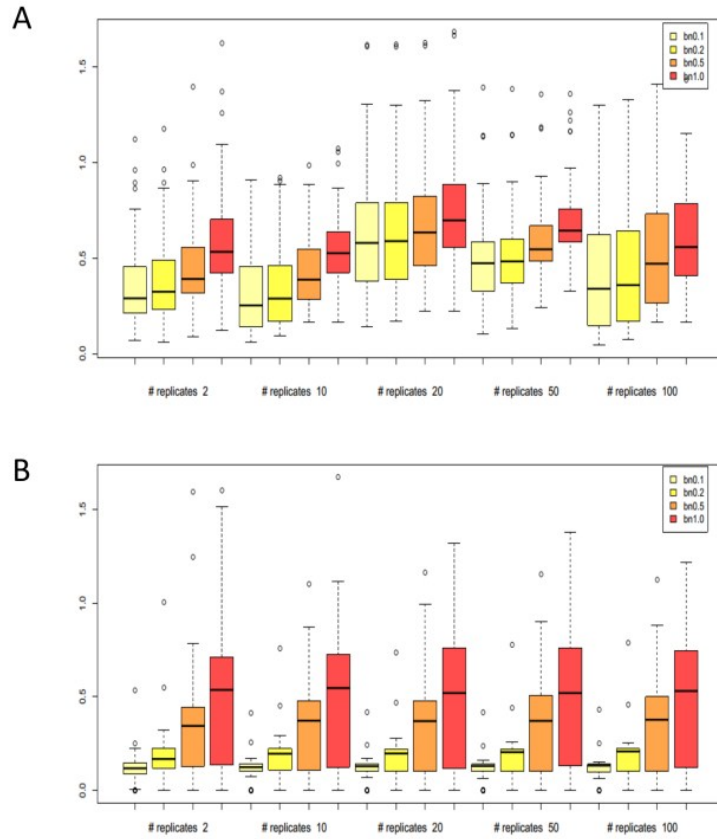

**Fig S1-3. CVs of the *foreground* and *background* networks. (A) *foreground*. (B) *background*.  $x$ -axis  $n$ replicate,  $y$ -axis CV, colors  $bn$ .**

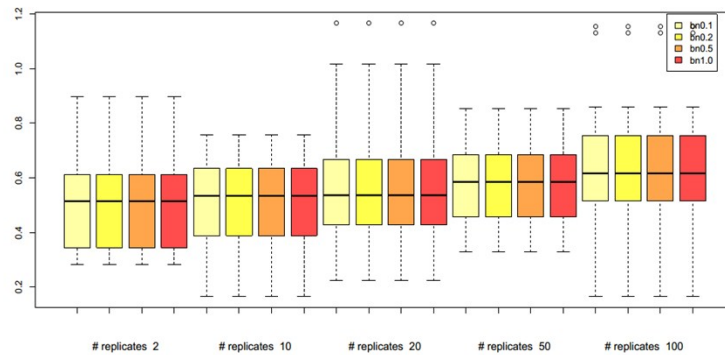

**Fig S1-4. CVs of the true regulators in the *foreground* network.  $x$ -axis  $n$ replicate,  $y$ -axis CV, colors  $bn$ .**
