# Supplementary material for: Dissection of the module network implementation “LemonTree”: enhancements towards applications in metagenomics and translation in autoimmune maladies
Source: Royal Society of Chemistry journal article supplement (doi:10.1039/c7mb00248c), 2017-07-26
Supplement: c7mb00248c2.xlsx [file c7mb00248c2.xlsx]

## Sheet: 1 Annotation
ID	Annotation
GENUS_1	Bacteria;Bacteroidetes;Bacteroidia;Bacteroidales;Prevotellaceae;Prevotella
GENUS_2	Bacteria;Firmicutes;Clostridia;Clostridiales;Ruminococcaceae;unclassified
GENUS_3	Bacteria;Firmicutes;Clostridia;Clostridiales;Lachnospiraceae;unclassified
GENUS_4	Bacteria;Firmicutes;Clostridia;Clostridiales;Lachnospiraceae;Roseburia
GENUS_5	Bacteria;Bacteroidetes;Bacteroidia;Bacteroidales;Porphyromonadaceae;Parabacteroides
GENUS_6	Bacteria;Firmicutes;Clostridia;Clostridiales;Lachnospiraceae;unclassified_Lachnospiraceae
GENUS_7	Bacteria;Bacteroidetes;Bacteroidia;Bacteroidales;Rikenellaceae;Alistipes
GENUS_8	Bacteria;Firmicutes;Clostridia;Clostridiales;Veillonellaceae;Phascolarctobacterium
GENUS_9	Bacteria;Firmicutes;Clostridia;Clostridiales;Ruminococcaceae;Faecalibacterium
GENUS_10	Bacteria;Bacteroidetes;Bacteroidia;Bacteroidales;Prevotellaceae;unclassified
GENUS_11	Bacteria;Firmicutes;unclassified;unclassified;unclassified;unclassified
GENUS_12	Bacteria;unclassified;unclassified;unclassified;unclassified;unclassified
GENUS_13	Bacteria;Firmicutes;Clostridia;Clostridiales;Ruminococcaceae;Oscillibacter
GENUS_14	Bacteria;Bacteroidetes;unclassified;unclassified;unclassified;unclassified
GENUS_15	Bacteria;Bacteroidetes;Bacteroidia;Bacteroidales;Prevotellaceae;unclassified_Prevotellaceae
GENUS_16	Bacteria;Firmicutes;Clostridia;Clostridiales;Veillonellaceae;Dialister
GENUS_17	Bacteria;Proteobacteria;Betaproteobacteria;Burkholderiales;Burkholderiales_incertae_sedis;unclassified
GENUS_18	Bacteria;Proteobacteria;Betaproteobacteria;Burkholderiales;Alcaligenaceae;Parasutterella
GENUS_19	Bacteria;Firmicutes;Clostridia;Clostridiales;Ruminococcaceae;Subdoligranulum
GENUS_20	Bacteria;Firmicutes;Clostridia;Clostridiales;Lachnospiraceae;Coprococcus
GENUS_21	Bacteria;Proteobacteria;Betaproteobacteria;Burkholderiales;Alcaligenaceae;Sutterella
GENUS_22	Bacteria;Firmicutes;Clostridia;Clostridiales;Incertae_Sedis_XIV;Blautia
GENUS_23	Bacteria;Proteobacteria;Alphaproteobacteria;unclassified;unclassified;unclassified
GENUS_24	Bacteria;Firmicutes;Clostridia;Clostridiales;Veillonellaceae;unclassified
GENUS_25	Bacteria;Proteobacteria;Gammaproteobacteria;Aeromonadales;Succinivibrionaceae;Succinivibrio
GENUS_26	Bacteria;Proteobacteria;Gammaproteobacteria;Enterobacteriales;Enterobacteriaceae;unclassified
GENUS_27	Bacteria;Proteobacteria;Betaproteobacteria;Burkholderiales;unclassified;unclassified
GENUS_28	Bacteria;Firmicutes;Clostridia;Clostridiales;Veillonellaceae;Megasphaera
GENUS_29	Bacteria;Firmicutes;Clostridia;Clostridiales;Veillonellaceae;Megamonas
GENUS_30	Bacteria;Firmicutes;Clostridia;Clostridiales;unclassified;unclassified
GENUS_31	Bacteria;Firmicutes;Bacilli;Lactobacillales;Streptococcaceae;Streptococcus
GENUS_32	Bacteria;Firmicutes;Erysipelotrichi;Erysipelotrichales;Erysipelotrichaceae;Catenibacterium
GENUS_33	Bacteria;Firmicutes;Clostridia;Clostridiales;Ruminococcaceae;unclassified_Ruminococcaceae
GENUS_34	Bacteria;Tenericutes;Mollicutes;unclassified_Mollicutes;unclassified;unclassified
GENUS_35	Bacteria;Firmicutes;Clostridia;Clostridiales;Peptostreptococcaceae;Sporacetigenium
GENUS_36	Bacteria;Firmicutes;Clostridia;Clostridiales;Lachnospiraceae;Dorea
GENUS_37	Bacteria;Firmicutes;Bacilli;Lactobacillales;Lactobacillaceae;Lactobacillus
GENUS_38	Bacteria;Firmicutes;Clostridia;Clostridiales;Veillonellaceae;Acidaminococcus
GENUS_39	Bacteria;Bacteroidetes;Bacteroidia;Bacteroidales;Porphyromonadaceae;unclassified
GENUS_40	Bacteria;Firmicutes;Clostridia;Clostridiales;unclassified_Clostridiales;unclassified
GENUS_41	Bacteria;Firmicutes;Clostridia;Clostridiales;Peptostreptococcaceae;unclassified_Peptostreptococcaceae
GENUS_42	Bacteria;Bacteroidetes;Bacteroidia;Bacteroidales;unclassified;unclassified
GENUS_43	Bacteria;Proteobacteria;unclassified;unclassified;unclassified;unclassified
GENUS_44	Bacteria;Actinobacteria;Actinobacteria;Coriobacteriales;Coriobacteriaceae;Collinsella
GENUS_45	Bacteria;Firmicutes;Clostridia;unclassified;unclassified;unclassified
GENUS_46	Bacteria;Bacteroidetes;Bacteroidia;Bacteroidales;Porphyromonadaceae;Barnesiella
GENUS_47	Bacteria;Firmicutes;Clostridia;Clostridiales;Eubacteriaceae;Eubacterium
GENUS_48	Bacteria;Proteobacteria;Gammaproteobacteria;Pasteurellales;Pasteurellaceae;Haemophilus
GENUS_49	Bacteria;Verrucomicrobia;Verrucomicrobiae;Verrucomicrobiales;Verrucomicrobiaceae;Akkermansia
GENUS_50	Bacteria;Fusobacteria;Fusobacteria;Fusobacteriales;Fusobacteriaceae;Fusobacterium
GENUS_51	Bacteria;Firmicutes;Clostridia;Clostridiales;Clostridiaceae;Clostridium
GENUS_52	Bacteria;Fusobacteria;Fusobacteria;Fusobacteriales;Fusobacteriaceae;unclassified
GENUS_53	Bacteria;Firmicutes;Erysipelotrichi;Erysipelotrichales;Erysipelotrichaceae;Coprobacillus
GENUS_54	Bacteria;Firmicutes;Bacilli;unclassified;unclassified;unclassified
GENUS_55	Bacteria;Proteobacteria;Deltaproteobacteria;Desulfovibrionales;Desulfovibrionaceae;unclassified_Desulfovibrionaceae
GENUS_56	Bacteria;Firmicutes;Clostridia;Clostridiales;Veillonellaceae;Veillonella
GENUS_57	Bacteria;Proteobacteria;Deltaproteobacteria;Desulfovibrionales;Desulfovibrionaceae;Desulfovibrio
GENUS_58	Bacteria;Firmicutes;Clostridia;Clostridiales;Ruminococcaceae;Ruminococcus
GENUS_59	Bacteria;Firmicutes;Clostridia;Clostridiales;Ruminococcaceae;Butyricicoccus
GENUS_60	Bacteria;Proteobacteria;Deltaproteobacteria;Desulfovibrionales;Desulfovibrionaceae;unclassified
GENUS_61	Bacteria;Bacteroidetes;Bacteroidia;Bacteroidales;Porphyromonadaceae;unclassified_Porphyromonadaceae
GENUS_62	Bacteria;Firmicutes;Erysipelotrichi;Erysipelotrichales;Erysipelotrichaceae;Turicibacter
GENUS_63	Bacteria;Firmicutes;Clostridia;Clostridiales;Incertae_Sedis_XIII;unclassified
GENUS_64	Bacteria;Firmicutes;Clostridia;unclassified_Clostridia;unclassified;unclassified
GENUS_65	Bacteria;Firmicutes;Clostridia;Clostridiales;Incertae_Sedis_XIII;Anaerovorax
GENUS_66	Bacteria;Tenericutes;Mollicutes;Entomoplasmatales;Spiroplasmataceae;Spiroplasma
GENUS_67	Bacteria;Actinobacteria;Actinobacteria;Bifidobacteriales;Bifidobacteriaceae;unclassified
GENUS_68	Bacteria;Actinobacteria;Actinobacteria;Bifidobacteriales;Bifidobacteriaceae;Bifidobacterium
GENUS_69	Bacteria;Firmicutes;unclassified_Firmicutes;unclassified;unclassified;unclassified
GENUS_70	Bacteria;Firmicutes;Clostridia;Clostridiales;Incertae_Sedis_XII;Fusibacter
GENUS_71	Bacteria;Firmicutes;Clostridia;Clostridiales;Veillonellaceae;Mitsuokella
GENUS_72	Bacteria;Firmicutes;Clostridia;Clostridiales;Lachnospiraceae;Pseudobutyrivibrio
GENUS_73	Bacteria;Actinobacteria;Actinobacteria;Coriobacteriales;Coriobacteriaceae;Adlercreutzia
GENUS_74	Bacteria;Firmicutes;Bacilli;Lactobacillales;unclassified;unclassified
GENUS_75	Bacteria;Proteobacteria;Alphaproteobacteria;Rhodobacterales;Rhodobacteraceae;unclassified
GENUS_76	Bacteria;Lentisphaerae;Lentisphaeria;Victivallales;Victivallaceae;Victivallis
GENUS_77	Bacteria;Proteobacteria;Betaproteobacteria;Burkholderiales;Oxalobacteraceae;Oxalobacter
GENUS_78	Bacteria;Actinobacteria;Actinobacteria;Coriobacteriales;Coriobacteriaceae;unclassified
GENUS_79	Bacteria;Firmicutes;Bacilli;Lactobacillales;Carnobacteriaceae;Granulicatella
GENUS_80	Bacteria;Verrucomicrobia;Opitutae;Puniceicoccales;Puniceicoccaceae;unclassified
GENUS_81	Bacteria;Proteobacteria;Gammaproteobacteria;Pseudomonadales;Pseudomonadaceae;Pseudomonas
GENUS_82	Bacteria;Firmicutes;Clostridia;Clostridiales;Incertae_Sedis_XIII;Mogibacterium
GENUS_83	Bacteria;Firmicutes;Erysipelotrichi;Erysipelotrichales;Erysipelotrichaceae;unclassified
GENUS_84	Bacteria;Firmicutes;Clostridia;Clostridiales;Lachnospiraceae;Anaerostipes
GENUS_85	Bacteria;Firmicutes;Clostridia;Clostridiales;Ruminococcaceae;Acetivibrio

## Sheet: 2 Raw Counts
ID	NORA.0	NORA.1	NORA.2	NORA.3	NORA.4	NORA.5	NORA.6	NORA.7	NORA.8	NORA.9	NORA.10	NORA.11	NORA.12	NORA.13	NORA.14	NORA.15	NORA.16	NORA.17	NORA.18	NORA.19	NORA.20	NORA.21	NORA.22	NORA.23	NORA.24	NORA.25	NORA.26	NORA.27	NORA.28	NORA.29	NORA.30	NORA.31	NORA.32	NORA.33	NORA.34	NORA.35	NORA.36	NORA.37	NORA.38	HLT.0	HLT.1	HLT.2	HLT.3	HLT.4	HLT.5	HLT.6	HLT.7	HLT.8	HLT.9
GENUS_1	0	3091	1862	0	9636	5236	6576	0	8010	5214	7556	5812	6075	6556	5515	9141	7544	4992	2185	4450	11041	1875	27	7405	9046	5725	3	5	8972	8460	0	3661	7383	9161	15	0	6	7598	0	0	0	0	21	7339	0	24	80	0	6353
GENUS_2	574	1063	993	299	201	68	9	1508	359	166	445	373	334	999	2279	0	722	3539	763	420	179	549	839	251	116	398	163	330	20	97	12	14	146	141	252	117	10	614	233	542	1158	68	1015	266	573	1229	1802	1069	218
GENUS_3	203	293	281	355	204	1025	143	574	137	269	326	1151	229	247	321	50	91	211	924	179	106	596	240	250	172	558	813	1680	1031	448	203	149	1207	126	428	580	471	699	354	226	281	799	354	677	1129	234	263	217	546
GENUS_4	448	131	428	1295	145	635	174	1638	246	593	292	663	255	312	335	313	161	69	112	942	179	618	280	686	190	155	1940	470	65	151	511	44	961	386	149	352	160	46	416	98	734	1	105	297	116	60	994	200	121
GENUS_5	194	33	30	2	29	150	148	110	8	270	12	35	56	228	169	472	148	8	491	108	16	568	590	17	5	42	84	341	4	74	70	0	68	10	103	1674	176	277	221	673	376	453	110	30	127	116	201	423	320
GENUS_6	410	141	243	658	83	310	298	409	135	220	246	164	375	305	306	42	174	372	221	290	21	485	408	159	68	558	345	850	100	59	126	127	75	210	166	171	158	77	74	790	537	1200	216	276	885	477	497	554	892
GENUS_7	221	14	12	69	10	81	15	199	0	4	62	94	18	105	95	7	57	163	129	0	10	75	1718	47	1	24	240	286	0	2	79	0	5	3	532	136	262	80	289	1436	272	99	86	12	119	97	84	567	4
GENUS_8	0	0	0	0	3	0	0	0	0	0	254	0	0	0	0	0	0	87	2	0	0	0	0	0	0	6	2	0	0	0	0	0	0	0	54	327	0	0	0	21	152	327	85	39	742	24	0	0	0
GENUS_9	203	208	1013	208	114	693	151	1615	318	350	353	537	333	343	490	72	353	969	375	633	153	326	277	176	135	460	367	117	76	115	181	220	148	146	697	76	234	168	333	110	327	199	65	133	1112	98	254	580	173
GENUS_10	1076	32	221	977	0	39	0	0	22	194	34	372	399	102	70	6	70	0	0	0	0	274	18	0	3	208	0	223	87	43	0	0	190	2	0	0	0	95	129	328	0	0	53	0	0	96	0	0	23
GENUS_11	12	19	145	82	215	507	7	277	94	39	60	98	70	56	8	86	90	55	10	131	1	243	178	168	73	157	102	28	5	20	28	13	29	140	65	0	0	3	148	148	54	77	104	98	144	1586	100	152	40
GENUS_12	1	700	372	0	112	0	15	4	116	1124	3	60	1309	2	0	0	3	5	4855	1	0	212	434	862	111	37	110	237	33	380	0	0	2	10	125	30	0	0	63	34	0	0	18	7	63	177	10	3	396
GENUS_13	59	552	2688	17	75	431	9	57	130	218	36	275	121	385	430	10	112	75	806	226	11	206	929	107	85	355	223	116	50	94	127	0	271	56	257	15	23	116	116	126	674	9	328	149	380	1263	453	556	136
GENUS_14	224	321	425	61	29	7	0	174	278	37	30	59	303	21	524	3	71	8	263	101	13	237	442	212	234	46	97	123	4	91	56	0	27	55	290	116	105	88	162	82	64	49	72	6	34	386	251	532	458
GENUS_15	191	513	11	166	0	8	0	0	219	462	1	9	1463	298	28	688	709	0	1051	0	195	463	1	0	607	64	2	10	328	210	0	0	1231	23	1068	0	0	918	0	59	0	0	7	407	0	0	0	0	381
GENUS_16	0	346	412	3	135	3	0	0	193	918	29	54	56	94	318	194	39	0	55	22	90	273	8	0	49	86	0	78	118	0	1	109	112	100	0	0	0	32	27	115	0	0	0	53	0	24	565	93	163
GENUS_17	0	0	2	0	0	0	0	0	0	0	27	0	0	0	0	0	0	0	37	0	44	510	0	0	41	0	42	0	0	0	0	216	0	0	0	0	0	0	0	0	0	0	0	0	0	0	0	13	2
GENUS_18	0	0	0	0	0	0	94	46	0	0	0	0	0	0	35	2	0	0	0	0	0	0	0	0	0	0	0	40	0	0	2	0	0	4	0	602	0	0	34	1	1	0	1	0	2	24	0	0	0
GENUS_19	340	22	66	12	10	47	49	236	7	28	63	8	18	42	12	0	73	30	21	33	4	26	16	14	6	11	56	8	3	10	2	18	38	22	252	16	2	3	235	147	106	5	49	13	55	43	41	49	3
GENUS_20	91	120	259	281	101	259	33	208	118	31	368	140	40	60	61	6	115	46	110	34	67	243	29	42	87	247	224	32	46	33	12	2	121	47	248	159	119	32	3	203	491	0	131	337	630	88	69	219	73
GENUS_21	0	44	1	0	0	0	0	0	29	5	0	434	0	74	0	0	124	0	160	0	0	35	0	68	35	324	179	0	76	168	0	0	135	0	103	0	0	218	0	0	0	0	0	49	0	0	0	0	160
GENUS_22	352	185	94	130	32	116	80	104	48	164	85	125	75	79	83	53	71	63	74	131	13	160	171	87	36	54	80	38	5	44	60	69	51	66	198	147	93	37	274	160	226	291	65	141	114	91	308	247	14
GENUS_23	0	0	0	0	0	0	0	21	0	0	0	0	0	3	0	0	0	0	0	0	0	0	0	0	0	0	26	79	0	0	0	0	0	0	0	0	1345	0	0	0	0	0	0	0	0	0	0	0	0
GENUS_24	89	0	11	0	0	311	63	60	13	0	0	0	8	0	0	0	0	0	9	4	0	0	42	121	1	0	47	0	412	151	125	0	0	0	0	0	0	0	0	0	0	0	0	0	0	0	0	0	1
GENUS_25	0	1816	0	0	0	0	0	0	1	0	0	0	0	0	0	0	0	0	0	0	0	0	0	0	150	1294	0	0	216	0	0	0	0	0	0	0	0	0	0	0	0	0	0	0	0	0	0	0	273
GENUS_26	0	17	0	0	3	2	71	3	10	14	1	9	0	40	42	4	7	19	2	98	90	0	38	3	9	16	3	4	0	1	5	0	9	4	0	0	0	3	0	21	25	2	3190	0	0	30	0	16	0
GENUS_27	297	0	9	31	0	1	0	0	0	10	11	0	73	19	69	110	0	0	7	136	44	96	421	27	17	2	6	0	0	0	181	5	0	0	11	0	13	18	0	4	5	0	4	4	22	0	36	18	3
GENUS_28	2872	0	0	0	0	0	0	0	0	122	0	1	3	0	0	0	0	0	0	0	6	0	0	0	19	0	0	0	0	0	11	0	0	0	0	0	0	0	0	0	0	0	0	36	0	0	0	0	32
GENUS_29	0	0	0	0	0	0	0	0	0	0	0	0	0	0	0	0	0	0	0	0	0	0	0	0	0	0	0	0	0	0	0	0	0	0	0	0	0	0	0	0	0	0	0	1030	0	0	0	0	0
GENUS_30	44	360	331	99	52	296	35	393	184	156	136	77	210	676	443	7	74	83	233	47	27	355	143	170	136	243	174	211	47	70	16	86	143	79	161	2	68	214	51	143	60	40	138	170	396	417	400	814	323
GENUS_31	31	6	0	1	0	12	0	21	5	465	5	0	0	1	11	16	144	6	0	0	23	9	76	0	2	38	27	2	0	1	1	164	25	233	10	0	1	3	0	0	6	0	17	5	38	0	8	35	7
GENUS_32	620	282	20	0	45	0	0	22	399	357	0	122	126	33	0	72	68	0	130	0	21	244	0	0	66	116	70	0	24	163	0	0	34	0	28	0	0	0	0	0	0	148	0	63	0	0	0	0	25
GENUS_33	237	235	176	155	0	125	8	129	34	29	46	16	75	138	45	1	24	27	214	58	9	136	117	68	22	98	81	472	24	119	1	24	92	18	121	9	165	65	153	949	227	147	231	44	502	1024	661	510	27
GENUS_34	0	0	0	0	0	0	0	0	0	0	0	0	0	0	0	0	0	0	0	0	0	0	0	0	0	0	896	0	0	0	0	0	0	0	0	0	0	0	0	0	0	0	0	0	0	0	0	0	0
GENUS_35	30	5	12	7	18	1	1	3	12	14	2	0	13	16	6	0	41	1	12	20	9	16	2	9	28	6	24	8	17	7	10	0	0	46	105	5	6	2	16	298	26	0	11	45	16	16	0	87	1
GENUS_36	17	32	9	7	0	13	12	13	15	42	2	4	11	5	15	11	11	2	7	9	0	16	7	4	3	11	4	2	0	4	4	5	2	6	0	0	0	0	0	30	1	43	9	18	11	20	12	6	6
GENUS_37	51	0	0	0	7	0	0	0	34	43	0	0	0	0	129	15	16	0	0	0	25	0	96	13	4	1	3	0	0	0	0	100	0	0	0	0	0	0	0	0	0	0	1	4	0	0	0	2	3
GENUS_38	357	0	0	0	0	0	0	0	0	0	0	0	0	0	0	30	0	0	0	0	0	0	0	0	0	0	0	0	0	0	5	0	1	0	0	0	0	0	0	0	0	0	2	0	0	0	0	26	4
GENUS_39	0	0	0	94	0	0	0	573	11	13	0	1	2	119	86	98	76	27	22	52	8	22	44	9	16	13	0	1267	6	28	5	0	51	0	14	0	38	116	3	15	0	0	0	105	0	8	0	26	13
GENUS_40	1	49	64	0	0	19	0	134	6	0	5	0	58	40	0	0	12	3	361	26	0	442	36	4	5	33	119	18	6	13	5	0	0	13	286	0	0	13	17	171	569	7	72	4	57	116	17	9	67
GENUS_41	8	21	0	0	133	0	84	9	17	0	3	0	7	0	0	0	0	0	29	110	23	0	3	5	4	18	303	0	0	8	23	0	0	16	37	24	0	37	3	171	7	6	19	8	2	0	0	0	0
GENUS_42	9	111	0	71	0	0	0	50	250	144	24	367	122	59	111	122	187	0	1	652	0	140	1	0	30	210	30	3	0	138	0	0	34	67	0	0	0	21	0	9	18	0	51	53	0	0	108	0	264
GENUS_43	0	0	1	0	62	0	0	0	8	0	0	0	0	3	0	302	36	33	43	0	0	0	0	0	30	0	5	0	0	0	0	0	0	0	0	0	0	0	8	0	689	0	0	0	0	0	0	0	0
GENUS_44	0	66	6	0	0	1	0	0	3	8	6	2	5	2	2	3	0	0	12	7	0	1	10	1	4	1	0	0	0	0	0	1	0	4	7	0	0	5	4	0	0	0	8	0	0	12	7	13	4
GENUS_45	0	28	529	0	0	1	0	60	15	0	0	0	41	28	1	0	0	0	103	0	0	25	255	17	6	0	0	0	2	1	0	0	0	1	63	0	0	41	0	4	8	0	319	1	15	122	37	199	27
GENUS_46	0	0	3	0	0	0	0	1	0	33	31	37	0	5	1	0	0	7	65	0	0	500	1	25	0	0	58	15	0	0	50	0	0	0	0	0	0	0	177	144	0	0	55	0	0	11	0	32	0
GENUS_47	0	0	0	0	0	0	0	0	0	0	0	0	0	0	0	0	0	0	0	0	0	0	0	0	0	0	0	0	0	0	0	0	0	0	3	0	0	0	0	0	0	0	0	0	4	0	0	0	0
GENUS_48	2	3	0	18	0	24	9	1	16	80	9	1	0	8	1	0	83	14	0	1	30	1	3	17	22	136	28	0	0	0	0	0	0	38	3	3	0	6	0	0	0	0	0	7	3	0	0	4	15
GENUS_49	48	0	1	0	9	0	0	3	0	0	0	0	0	0	0	0	0	0	0	0	0	5	48	7	0	0	0	1	0	0	0	0	0	0	0	0	0	0	0	39	6	0	49	0	80	63	10	0	0
GENUS_50	0	0	0	0	0	0	0	0	0	0	0	0	0	0	0	0	0	0	0	0	0	0	0	0	0	0	0	0	0	0	0	0	0	0	0	24	0	0	0	0	0	0	0	0	0	0	0	0	0
GENUS_51	2	26	35	0	7	0	4	2	34	24	0	0	8	0	0	174	4	0	36	17	17	18	0	9	60	1	75	6	24	44	1	0	0	27	22	9	3	0	2	10	11	0	3	40	3	3	0	12	7
GENUS_52	0	0	0	0	0	0	0	0	0	0	0	0	0	0	0	0	0	0	0	0	0	0	0	0	0	0	0	0	0	0	0	0	0	0	0	0	0	0	0	0	0	0	0	0	0	0	0	0	0
GENUS_53	6	0	0	12	0	1	2	0	0	0	2	0	0	0	8	0	0	0	3	0	0	2	0	1	1	0	22	1	0	0	1	0	0	0	0	0	37	0	0	43	3	18	43	0	1	17	1	0	0
GENUS_54	0	7	0	0	0	176	0	0	14	0	234	0	1	0	0	0	0	0	0	0	0	0	0	0	0	0	0	0	0	43	0	0	8	0	0	0	0	0	0	36	1	0	0	0	98	9	0	0	0
GENUS_55	124	0	0	0	0	0	0	0	0	0	0	0	0	0	0	0	0	0	0	0	0	0	0	0	0	0	0	0	0	0	0	0	1	0	0	0	0	0	0	0	0	0	13	0	0	0	0	0	12
GENUS_56	6	2	1	29	3	13	0	0	8	11	0	0	0	1	12	3	51	7	0	0	6	0	0	0	2	14	3	0	0	0	7	88	5	44	6	0	5	3	0	0	0	0	0	0	3	0	0	1	1
GENUS_57	0	0	32	0	0	0	0	0	2	43	0	0	0	34	0	0	0	0	179	0	0	51	0	0	2	0	0	0	0	1	2	0	0	0	0	0	0	0	0	89	0	129	0	0	0	0	0	0	1
GENUS_58	0	4	4	0	3	0	0	0	12	0	0	5	17	4	0	0	17	0	9	15	4	0	39	18	24	21	6	27	0	12	0	0	0	12	20	25	1	0	4	0	24	0	88	33	11	3	10	0	7
GENUS_59	0	0	3	10	8	16	0	1	0	1	0	8	7	2	12	1	5	3	14	8	2	39	5	0	1	7	0	2	5	1	3	6	8	7	16	0	6	18	15	6	7	11	1	6	15	18	2	0	0
GENUS_60	3	2	3	0	4	12	0	1	0	0	0	0	0	0	3	0	0	0	2	1	1	1	2	1	0	1	2	2	0	1	3	0	0	0	0	0	0	0	3	10	7	67	1	0	9	0	0	19	0
GENUS_61	0	41	0	0	0	0	0	0	0	0	0	0	0	0	0	0	0	0	88	0	0	0	0	0	0	0	0	0	0	0	0	0	0	0	0	0	0	0	0	0	0	0	0	0	0	88	0	0	0
GENUS_62	16	1	0	0	0	1	2	2	0	0	0	0	1	0	0	0	0	0	0	18	0	0	0	0	3	3	17	1	0	1	0	0	0	0	0	0	0	10	0	1	0	0	0	0	1	0	0	14	0
GENUS_63	0	3	11	0	0	5	0	2	5	0	0	0	3	2	6	0	0	0	6	2	0	2	5	3	0	0	1	0	0	0	0	0	0	1	0	0	0	6	0	4	0	0	15	0	4	92	0	6	5
GENUS_64	0	0	2	0	0	0	0	0	0	0	0	0	0	0	0	0	0	0	0	0	0	0	0	0	0	0	0	0	0	1	0	0	0	0	0	0	0	0	0	0	0	0	0	0	0	0	0	0	0
GENUS_65	1	10	15	0	4	1	2	1	1	6	0	4	2	2	6	0	2	1	12	6	1	6	0	0	2	0	0	1	0	4	0	0	1	1	3	0	0	0	0	28	0	0	1	0	1	5	10	0	10
GENUS_66	0	0	1	0	0	1	0	0	0	0	0	0	0	0	0	0	0	0	9	0	0	0	0	0	0	0	0	0	0	0	0	0	0	0	0	0	0	0	0	0	0	0	0	0	15	7	21	0	0
GENUS_67	0	0	0	0	0	0	0	0	0	0	3	0	1	0	0	0	0	0	0	0	0	0	1	0	0	0	0	0	0	0	0	0	0	0	0	0	0	0	0	0	0	0	1	0	0	0	0	0	0
GENUS_68	0	13	0	0	0	0	0	0	17	8	2	0	0	0	0	0	2	1	0	0	0	0	0	0	0	0	0	0	0	0	0	0	0	0	0	0	0	0	0	1	0	0	2	0	0	0	29	1	0
GENUS_69	9	1	0	0	0	0	3	0	0	0	0	0	0	0	0	0	0	0	0	0	0	0	4	0	0	0	0	0	0	0	0	0	0	0	0	2	0	0	0	0	3	2	35	1	0	0	0	0	0
GENUS_70	0	10	0	0	0	24	0	0	0	9	0	0	5	0	0	0	0	0	0	0	0	0	0	0	0	0	0	0	0	0	0	0	0	0	0	0	0	0	0	0	0	8	8	0	0	0	2	0	0
GENUS_71	0	0	5	0	0	144	0	0	68	162	0	0	0	4	0	0	0	0	0	0	9	72	0	49	30	0	0	0	0	0	0	0	0	39	0	0	0	0	0	0	0	0	0	0	0	0	0	0	34
GENUS_72	0	1	0	0	3	8	1	0	3	0	0	11	0	0	0	0	0	0	3	0	0	0	0	0	0	3	0	4	26	15	1	1	19	0	5	6	5	27	2	0	1	0	0	2	0	0	0	0	0
GENUS_73	0	0	0	0	0	0	0	0	0	0	0	0	0	0	0	0	0	0	0	0	0	0	0	0	0	0	0	0	0	0	0	0	0	0	3	0	0	0	0	0	0	0	0	0	0	1	0	1	0
GENUS_74	0	0	0	0	0	0	0	0	0	0	0	0	3	0	0	0	0	0	0	0	0	0	0	0	0	0	0	0	0	0	0	0	0	0	0	0	0	0	0	0	0	0	0	11	0	0	0	0	0
GENUS_75	0	0	0	0	0	0	0	0	0	0	0	0	0	0	0	0	0	0	0	0	0	0	0	0	0	0	0	0	0	0	0	0	0	0	0	0	0	0	0	0	0	0	0	0	0	0	0	0	0
GENUS_76	0	0	0	0	0	0	0	0	0	0	0	0	0	0	0	0	0	0	104	0	0	0	0	0	0	0	0	0	0	0	0	0	0	0	0	0	0	0	0	0	0	0	4	0	0	0	0	3	0
GENUS_77	0	0	1	0	0	0	0	1	0	2	0	0	0	0	0	0	0	0	3	0	0	0	1	4	0	0	0	0	0	1	0	0	0	0	0	0	0	0	0	11	5	0	3	0	1	0	0	1	3
GENUS_78	0	0	0	0	0	0	0	0	0	0	0	0	0	0	0	0	0	0	0	0	0	0	0	0	0	0	0	0	0	0	0	0	0	0	0	0	0	0	2	0	0	0	0	0	15	0	2	0	0
GENUS_79	0	1	0	1	0	0	0	1	1	0	0	0	0	0	0	0	0	0	0	0	0	0	0	0	0	8	0	0	0	0	0	0	0	5	0	0	0	0	0	0	0	0	0	0	1	0	0	0	0
GENUS_80	0	0	0	0	0	0	0	0	0	0	0	0	6	0	0	0	0	0	26	0	0	0	0	0	0	0	0	0	0	0	0	0	0	0	0	0	0	0	0	0	0	0	0	0	0	0	0	0	0
GENUS_81	0	0	0	0	0	0	0	0	0	0	0	0	0	0	0	0	0	0	0	0	0	0	0	0	0	0	0	0	0	0	0	0	0	0	0	0	0	0	0	0	0	0	0	0	0	0	0	0	0
GENUS_82	1	6	0	0	0	0	0	0	2	0	0	0	0	0	0	0	0	0	2	0	0	0	0	3	0	0	0	0	0	0	0	0	0	0	0	0	0	0	0	0	0	0	0	0	0	0	0	0	0
GENUS_83	0	8	3	0	0	0	0	0	1	0	0	0	0	0	2	0	0	0	0	0	0	0	0	2	0	2	0	0	0	1	0	0	0	0	0	0	0	0	0	0	0	0	0	0	0	0	0	0	0
GENUS_84	0	0	0	0	0	0	0	0	0	0	0	0	0	0	0	0	0	0	0	0	0	0	0	0	0	0	0	0	0	0	0	0	0	0	0	0	0	0	0	0	0	0	0	0	0	0	0	0	0
GENUS_85	0	0	0	0	0	0	0	0	0	0	0	0	5	0	0	0	0	0	0	0	0	0	0	0	0	0	0	0	0	25	0	0	0	0	0	0	0	0	0	0	0	0	0	0	0	0	0	0	0
[truncated: 30 more columns]

## Sheet: 3 TMM Normalized
ID	NORA.0	NORA.1	NORA.2	NORA.3	NORA.4	NORA.5	NORA.6	NORA.7	NORA.8	NORA.9	NORA.10	NORA.11	NORA.12	NORA.13	NORA.14	NORA.15	NORA.16	NORA.17	NORA.18	NORA.19	NORA.20	NORA.21	NORA.22	NORA.23	NORA.24	NORA.25	NORA.26	NORA.27	NORA.28	NORA.29	NORA.30	NORA.31	NORA.32	NORA.33	NORA.34	NORA.35	NORA.36	NORA.37	NORA.38	HLT.0	HLT.1	HLT.2	HLT.3	HLT.4	HLT.5	HLT.6	HLT.7	HLT.8	HLT.9
GENUS_1	0	4555.61	3983.13	0	23376.7	4063.55	15336.5	0	12592.6	6217.82	21167.3	6068.72	18753.4	15649.3	8271.49	48369.6	8390.96	12452.9	3118.5	4143.15	31222.5	2183.6	37.4045	12726.3	28361.2	5680.13	1.52032	2.49843	60599.4	26010.9	0	8435.45	15390.5	17642.4	7.68174	0	2.76222	10809.1	0	0	0	0	21.6524	23292.7	0	12.3881	53.9519	0	11340.2
GENUS_2	535.559	1566.68	2124.19	264.703	487.62	52.7733	20.9898	1484.5	564.389	197.959	1246.62	389.475	1031.05	2384.63	3418.08	0	803.059	8828.26	1088.98	391.039	506.189	639.358	1162.31	431.37	363.686	394.88	82.6042	164.897	135.086	298.234	7.67351	32.2579	304.349	271.54	129.053	113.86	4.60369	873.491	111.815	270.904	1074.03	35.0026	1046.53	844.238	329.195	634.372	1215.27	683.888	389.134
GENUS_3	189.405	431.833	601.106	314.28	494.898	795.481	333.504	565.055	215.38	320.789	913.254	1201.84	706.919	589.594	481.441	264.575	101.217	526.353	1318.76	166.657	299.754	694.094	332.484	429.652	539.258	553.626	412.008	839.473	6963.66	1377.41	129.81	343.316	2516.09	242.653	219.186	564.436	216.834	994.414	169.882	112.96	260.624	411.28	364.998	2148.68	648.624	120.784	177.367	138.825	974.621
GENUS_4	417.998	193.072	915.563	1146.46	351.766	492.81	405.802	1612.47	386.74	707.167	818.006	692.285	787.18	744.751	502.439	1656.24	179.075	172.125	159.85	877.045	506.189	719.715	387.898	1178.96	595.692	153.785	983.143	234.853	439.028	464.261	326.763	101.382	2003.29	743.366	76.3053	342.554	73.6591	65.4407	199.636	48.9826	680.775	0.514744	108.262	942.627	66.6434	30.9701	670.352	127.949	215.987
GENUS_5	181.008	48.6364	64.175	1.77059	70.3532	116.412	345.165	108.286	12.5769	321.982	33.6167	36.5459	172.871	544.241	253.469	2497.59	164.616	19.9565	700.772	100.553	45.2459	661.485	817.357	29.2163	15.6761	41.6708	42.5691	170.393	27.0171	227.519	44.7621	0	141.752	19.2582	52.7479	1629.08	81.025	394.067	106.056	336.38	348.735	233.179	113.417	95.2148	72.963	59.8756	135.554	270.612	571.207
GENUS_6	382.542	207.81	519.818	582.524	201.356	240.584	694.995	402.627	212.236	262.355	689.142	171.244	1157.62	728.041	458.944	222.243	193.535	927.978	315.419	270.003	59.3853	564.825	565.223	273.258	213.195	553.626	174.837	424.734	675.428	181.4	80.5718	292.625	156.344	404.422	85.0112	166.411	72.7383	109.542	35.5121	394.86	498.06	617.693	222.71	875.976	508.443	246.213	335.176	354.419	1592.24
GENUS_7	206.2	20.6336	25.67	61.0854	24.2597	62.8624	34.983	195.899	0	4.7701	173.686	98.152	55.5657	250.637	142.483	37.0405	63.3994	406.614	184.113	0	28.2787	87.344	2380.03	80.7745	3.13522	23.8119	121.626	142.91	0	6.14915	50.5172	0	10.4229	5.77745	272.446	132.351	120.617	113.81	138.689	717.745	252.276	50.9596	88.6717	38.0859	68.3669	50.0684	56.6494	362.735	7.14008
GENUS_8	0	0	0	0	7.27791	0	0	0	0	0	711.553	0	0	0	0	0	0	217.027	2.85447	0	0	0	0	0	0	5.95297	1.01355	0	0	0	0	0	0	0	27.6543	318.225	0	0	0	10.4963	140.978	168.321	87.6407	123.779	426.288	12.3881	0	0	0
GENUS_9	189.405	306.557	2166.98	184.141	276.561	537.822	352.162	1589.83	499.933	417.383	988.891	560.719	1027.96	818.748	734.91	380.988	392.631	2417.23	535.212	589.352	432.664	379.655	383.742	302.475	423.255	456.394	185.986	58.4633	513.325	353.576	115.742	506.91	308.519	281.169	356.945	73.9606	107.726	239.001	159.804	54.9805	303.288	102.434	67.0193	422.119	638.857	50.5846	171.297	371.052	308.809
GENUS_10	1003.94	47.1626	472.756	864.934	0	30.2671	0	0	34.5865	231.35	95.2473	388.431	1231.71	243.476	104.987	31.749	77.8589	0	0	0	0	319.097	24.9363	0	9.40566	206.37	0	111.43	587.622	132.207	0	0	396.071	3.85163	0	0	0	135.149	61.9062	163.942	0	0	54.6465	0	0	49.5522	0	0	41.0555
GENUS_11	11.1964	28.0028	310.179	72.5942	521.584	393.472	16.3254	272.683	147.779	46.5084	168.083	102.329	216.089	133.673	11.9985	455.069	100.104	137.201	14.2723	121.967	2.82787	282.995	246.592	288.726	228.871	155.769	51.691	13.9912	33.7714	61.4915	17.9048	29.9538	60.453	269.614	33.2875	0	0	4.26787	71.0242	73.9737	50.0843	39.6353	107.231	311.035	82.7297	818.644	67.4398	97.2413	71.4008
GENUS_12	0.93303	1031.68	795.77	0	271.709	0	34.983	3.93767	182.365	1340.4	8.40417	62.6502	4040.86	4.77404	0	0	3.33681	12.4728	6929.22	0.931045	0	246.892	601.242	1481.44	348.009	36.71	55.7452	118.426	222.891	1168.34	0	0	4.16917	19.2582	64.0145	29.195	0	0	30.2333	16.994	0	0	18.5592	22.2168	36.1942	91.3619	6.74398	1.91924	706.868
GENUS_13	55.0488	813.555	5750.08	15.05	181.948	334.49	20.9898	56.1118	204.375	259.97	100.85	287.147	373.525	919.003	644.921	52.915	124.574	187.092	1150.35	210.416	31.1066	239.905	1286.99	183.891	266.494	352.217	113.011	57.9636	337.714	289.01	81.2113	0	564.923	107.846	131.614	14.5975	10.5885	165.024	55.6676	62.9776	625.126	4.6327	338.19	472.9	218.314	651.921	305.502	355.698	242.763
GENUS_14	208.999	473.1	909.146	54.003	70.3532	5.43255	0	171.289	437.048	44.1234	84.0417	61.606	935.355	50.1274	785.904	15.8745	78.9711	19.9565	375.362	94.0356	36.7623	276.007	612.325	364.345	733.642	45.6394	49.1571	61.4615	27.0171	279.786	35.8097	0	56.2838	105.92	148.514	112.887	48.3388	125.191	77.7427	40.9854	59.3592	25.2225	74.2368	19.043	19.5334	199.241	169.274	340.344	817.539
GENUS_15	178.209	756.075	23.5308	146.959	0	6.20863	0	0	344.293	550.946	2.80139	9.39753	4516.25	711.332	41.9949	3640.55	788.599	0	1500.02	0	551.435	539.204	1.38535	0	1903.08	63.4983	1.01355	4.99687	2215.4	645.661	0	0	2566.12	44.2938	546.94	0	0	1305.97	0	29.4895	0	0	7.21747	1291.75	0	0	0	0	680.093
GENUS_16	0	509.946	881.337	2.65589	327.506	2.32824	0	0	303.418	1094.74	81.2404	56.3852	172.871	224.38	476.942	1026.55	43.3785	0	78.4978	20.483	254.508	317.932	11.0828	0	153.626	85.3259	0	38.9756	797.005	0	0.639459	251.151	233.474	192.582	0	0	0	45.5239	12.9571	57.4796	0	0	0	168.213	0	12.3881	381.035	59.4963	290.958
GENUS_17	0	0	4.27833	0	0	0	0	0	0	0	75.6376	0	0	0	0	0	0	0	52.8076	0	124.426	593.939	0	0	128.544	0	21.2845	0	0	0	0	497.694	0	0	0	0	0	0	0	0	0	0	0	0	0	0	0	8.31669	3.57004
GENUS_18	0	0	0	0	0	0	219.226	45.2832	0	0	0	0	0	0	52.4936	10.583	0	0	0	0	0	0	0	0	0	0	0	19.9875	0	0	1.27892	0	0	7.70327	0	585.846	0	0	16.3164	0.499822	0.927487	0	1.03107	0	1.14902	12.3881	0	0	0
GENUS_19	317.23	32.4243	141.185	10.6235	24.2597	36.4757	114.278	232.322	11.0048	33.3907	176.488	8.35336	55.5657	100.255	17.9978	0	81.1957	74.8369	29.9719	30.7245	11.3115	30.2793	22.1656	24.0605	18.8113	10.9138	28.3794	3.99749	20.2628	30.7458	1.27892	41.4745	79.2142	42.368	129.053	15.5707	0.920738	4.26787	112.775	73.4739	98.3136	2.57372	50.5223	41.2597	31.5982	22.1953	27.6503	31.3475	5.35506
GENUS_20	84.9058	176.86	554.044	248.768	245.023	201.004	76.9625	204.759	185.51	36.9682	1030.91	146.184	123.479	143.221	91.4889	31.749	127.911	114.75	156.996	31.6555	189.467	282.995	40.1752	72.1815	272.764	245.064	113.517	15.99	310.697	101.461	7.67351	4.60827	252.235	90.5134	127.005	154.733	54.7839	45.5239	1.43968	101.464	455.396	0	135.07	1069.58	361.942	45.4229	46.5335	140.104	130.306
GENUS_21	0	64.8486	2.13917	0	0	0	0	0	45.5913	5.96262	0	453.17	0	176.64	0	0	137.921	0	228.357	0	0	40.7605	0	116.865	109.733	321.46	90.7126	0	513.325	516.529	0	0	281.419	0	52.7479	0	0	310.132	0	0	0	0	0	155.518	0	0	0	0	285.603
GENUS_22	328.427	272.659	201.082	115.088	77.6311	90.0251	186.576	102.379	75.4615	195.574	238.118	130.521	231.524	188.575	124.485	280.449	78.9711	157.158	105.615	121.967	36.7623	186.334	236.895	149.519	112.868	53.5767	40.542	18.9881	33.7714	135.281	38.3675	158.985	106.314	127.104	101.399	143.055	42.8143	52.6371	131.491	79.9716	209.612	149.79	67.0193	447.51	65.4943	46.9714	207.715	158.017	24.9903
GENUS_23	0	0	0	0	0	0	0	20.6728	0	0	0	0	0	7.16106	0	0	0	0	0	0	0	0	0	0	0	0	13.1761	39.4752	0	0	0	0	0	0	0	0	619.197	0	0	0	0	0	0	0	0	0	0	0	0
GENUS_24	83.0397	0	23.5308	0	0	241.36	146.928	59.065	20.4375	0	0	0	24.6959	0	0	0	0	0	12.8451	3.72418	0	0	58.1847	207.951	3.13522	0	23.8184	0	2782.76	464.261	79.9324	0	0	0	0	0	0	0	0	0	0	0	0	0	0	0	0	0	1.78502
GENUS_25	0	2676.48	0	0	0	0	0	0	1.57212	0	0	0	0	0	0	0	0	0	0	0	0	0	0	0	470.283	1283.86	0	0	1458.92	0	0	0	0	0	0	0	0	0	0	0	0	0	0	0	0	0	0	0	487.311
GENUS_26	0	25.0551	0	0	7.27791	1.55216	165.586	2.95325	15.7212	16.6953	2.80139	9.39753	0	95.4808	62.9923	21.166	7.78589	47.3967	2.85447	91.2424	254.508	0	52.6433	5.15582	28.217	15.8746	1.52032	1.99875	0	3.07458	3.19729	0	18.7613	7.70327	0	0	0	4.26787	0	10.4963	23.1872	1.02949	3289.1	0	0	15.4851	0	10.2359	0
GENUS_27	277.11	0	19.2525	27.4442	0	0.776079	0	0	0	11.9252	30.8153	0	225.35	45.3534	103.487	582.065	0	0	9.99063	126.622	124.426	111.8	583.232	46.4024	53.2987	1.98432	3.04065	0	0	0	115.742	11.5207	0	0	5.63327	0	5.9848	25.6072	0	1.99929	4.63743	0	4.12427	12.6953	12.6393	0	24.2783	11.5154	5.35506
GENUS_28	2679.66	0	0	0	0	0	0	0	0	145.488	0	1.04417	9.26095	0	0	0	0	0	0	0	16.9672	0	0	0	59.5692	0	0	0	0	0	7.03405	0	0	0	0	0	0	0	0	0	0	0	0	114.258	0	0	0	0	57.1207
GENUS_29	0	0	0	0	0	0	0	0	0	0	0	0	0	0	0	0	0	0	0	0	0	0	0	0	0	0	0	0	0	0	0	0	0	0	0	0	0	0	0	0	0	0	0	3269.04	0	0	0	0	0
GENUS_30	41.0533	530.579	708.064	87.6442	126.151	229.719	81.6269	386.876	289.269	186.034	380.989	80.4011	648.266	1613.63	664.419	37.0405	82.308	207.049	332.545	43.7591	76.3525	413.428	198.105	292.163	426.39	241.095	88.1788	105.434	317.451	215.22	10.2313	198.156	298.096	152.14	82.4507	1.94633	31.3051	304.441	24.4746	71.4746	55.6492	20.5898	142.287	539.551	227.507	215.242	269.759	520.753	576.562
GENUS_31	28.9239	8.84299	0	0.885295	0	9.31294	0	20.6728	7.86058	554.524	14.007	0	0	2.38702	16.498	84.664	160.167	14.9674	0	0	65.041	10.4813	105.287	0	6.27044	37.7021	13.6829	0.999373	0	3.07458	0.639459	377.878	52.1146	448.715	5.12116	0	0.460369	4.26787	0	0	5.56492	0	17.5281	15.8691	21.8314	0	5.39519	22.3911	12.4951
GENUS_32	578.479	415.62	42.7833	0	109.169	0	0	21.6572	627.274	425.731	0	127.389	388.96	78.7717	0	380.988	75.6343	0	185.54	0	59.3853	284.159	0	0	206.925	115.091	35.4742	0	162.103	501.156	0	0	70.8759	0	14.3392	0	0	0	0	0	0	76.1821	0	199.951	0	0	0	0	44.6255
GENUS_33	221.128	346.35	376.493	137.221	0	97.0098	18.6576	126.99	53.4519	34.5832	128.864	16.7067	231.524	329.409	67.4918	5.2915	26.6945	67.3532	305.428	54.0006	25.4508	158.384	162.086	116.865	68.9748	97.2318	41.0487	235.852	162.103	365.875	0.639459	55.2993	191.782	34.6647	61.966	8.75849	75.9609	92.4705	73.4237	474.331	210.54	75.6674	238.176	139.648	288.405	528.557	445.777	326.27	48.1956
GENUS_34	0	0	0	0	0	0	0	0	0	0	0	0	0	0	0	0	0	0	0	0	0	0	0	0	0	0	454.07	0	0	0	0	0	0	0	0	0	0	0	0	0	0	0	0	0	0	0	0	0	0
GENUS_35	27.9909	7.36916	25.67	6.19707	43.6675	0.776079	2.3322	2.95325	18.8654	16.6953	5.60278	0	40.1308	38.1923	8.9989	0	45.6031	2.49456	17.1268	18.6209	25.4508	18.6334	2.7707	15.4675	87.7862	5.95297	12.1626	3.99749	114.823	21.522	6.39459	0	0	88.5876	53.7722	4.86583	2.76222	2.84525	7.67829	148.947	24.1147	0	11.3417	142.822	9.19219	8.2587	0	55.6578	1.78502
GENUS_36	15.8615	47.1626	19.2525	6.19707	0	10.089	27.9864	12.7974	23.5817	50.086	5.60278	4.17668	33.9568	11.9351	22.4973	58.2065	12.235	4.98913	9.99063	8.37941	0	18.6334	9.69745	6.87443	9.40566	10.9138	2.0271	0.999373	0	12.2983	2.55784	11.5207	4.16917	11.5549	0	0	0	0	0	14.9947	0.927487	22.134	9.2796	57.1289	6.31963	10.3234	8.09278	3.83847	10.7101
GENUS_37	47.5845	0	0	0	16.9818	0	0	0	53.4519	51.2785	0	0	0	0	193.476	79.3725	17.7963	0	0	0	70.6967	0	132.994	22.3419	12.5409	0.992162	1.52032	0	0	0	0	230.414	0	0	0	0	0	0	0	0	0	0	1.03107	12.6953	0	0	0	1.27949	5.35506
GENUS_38	333.092	0	0	0	0	0	0	0	0	0	0	0	0	0	0	158.745	0	0	0	0	0	0	0	0	0	0	0	0	0	0	3.19729	0	2.08459	0	0	0	0	0	0	0	0	0	2.06213	0	0	0	0	16.6334	7.14008
GENUS_39	0	0	0	83.2178	0	0	0	564.071	17.2933	15.5028	0	1.04417	6.17396	284.056	128.984	518.567	84.5325	67.3532	31.3991	48.4144	22.623	25.6209	60.9554	15.4675	50.1635	12.8981	0	633.103	40.5257	86.0881	3.19729	0	106.314	0	7.16962	0	17.494	165.024	1.43968	7.49733	0	0	0	333.252	0	4.12935	0	16.6334	23.2053
GENUS_40	0.93303	72.2177	136.907	0	0	14.7455	0	131.912	9.43269	0	14.007	0	179.045	95.4808	0	0	13.3472	7.48369	515.231	24.2072	0	514.747	49.8726	6.87443	15.6761	32.7413	60.3062	8.99436	40.5257	39.9695	3.19729	0	0	25.0356	146.465	0	0	18.4941	8.15819	85.4696	527.74	3.60321	74.2368	12.6953	32.7472	59.8756	11.4648	5.75771	119.596
GENUS_41	7.46424	30.9505	0	0	322.654	0	195.905	8.85975	26.726	0	8.40417	0	21.6089	0	0	0	0	0	41.3898	102.415	65.041	0	4.15605	8.59303	12.5409	17.8589	153.553	0	0	24.5966	14.7076	0	0	30.8131	18.9483	23.356	0	52.6371	1.43968	85.4696	6.49241	3.08846	19.5903	25.3906	1.14902	0	0	0	0
GENUS_42	8.39727	163.595	0	62.856	0	0	0	49.2208	393.029	171.723	67.2334	383.21	376.612	140.834	166.48	645.563	207.994	0	1.42723	607.042	0	163.042	1.38535	0	94.0566	208.354	15.2032	1.49906	0	424.292	0	0	70.8759	129.03	0	0	0	29.8751	0	4.4984	16.6948	0	52.5844	168.213	0	0	72.835	0	471.245
GENUS_43	0	0	2.13917	0	150.41	0	0	0	12.5769	0	0	0	0	7.16106	0	1598.03	40.0417	82.3206	61.371	0	0	0	0	0	94.0566	0	2.53387	0	0	0	0	0	0	0	0	0	0	0	3.83915	0	639.038	0	0	0	0	0	0	0	0
GENUS_44	0	97.2729	12.835	0	0	0.776079	0	0	4.71635	9.54019	16.8083	2.08834	15.4349	4.77404	2.99963	15.8745	0	0	17.1268	6.51732	0	1.16459	13.8535	1.71861	12.5409	0.992162	0	0	0	0	0	2.30414	0	7.70327	3.58481	0	0	7.11312	1.91957	0	0	0	8.24853	0	0	6.19403	4.72079	8.31669	7.14008
GENUS_45	0	41.2673	1131.62	0	0	0.776079	0	59.065	23.5817	0	0	0	126.566	66.8366	1.49982	0	0	0	147.005	0	0	29.1147	353.264	29.2163	18.8113	0	0	0	13.5086	3.07458	0	0	0	1.92582	32.2633	0	0	58.3275	0	1.99929	7.4199	0	328.91	3.17383	8.61768	62.9726	24.9527	127.309	48.1956
GENUS_46	0	0	6.4175	0	0	0	0	0.984417	0	39.3533	86.8431	38.6343	0	11.9351	1.49982	0	0	17.4619	92.7702	0	0	582.294	1.38535	42.9652	0	0	29.3929	7.4953	0	0	31.9729	0	0	0	0	0	0	0	84.9411	71.9744	0	0	56.7087	0	0	5.67786	0	20.4718	0
GENUS_47	0	0	0	0	0	0	0	0	0	0	0	0	0	0	0	0	0	0	0	0	0	0	0	0	0	0	0	0	0	0	0	0	0	0	1.53635	0	0	0	0	0	0	0	0	0	2.29805	0	0	0	0
GENUS_48	1.86606	4.42149	0	15.9353	0	18.6259	20.9898	0.984417	25.1538	95.4019	25.2125	1.04417	0	19.0962	1.49982	0	92.3184	34.9239	0	0.931045	84.8361	1.16459	4.15605	29.2163	68.9748	134.934	14.1897	0	0	0	0	0	0	73.1811	1.53635	2.9195	0	8.53574	0	0	0	0	0	22.2168	1.72354	0	0	2.55898	26.7753
GENUS_49	44.7855	0	2.13917	0	21.8337	0	0	2.95325	0	0	0	0	0	0	0	0	0	0	0	0	0	5.82294	66.4968	12.0302	0	0	0	0.499687	0	0	0	0	0	0	0	0	0	0	0	19.4931	5.56492	0	50.5223	0	45.9609	32.5186	6.74398	0	0
GENUS_50	0	0	0	0	0	0	0	0	0	0	0	0	0	0	0	0	0	0	0	0	0	0	0	0	0	0	0	0	0	0	0	0	0	0	0	23.356	0	0	0	0	0	0	0	0	0	0	0	0	0
GENUS_51	1.86606	38.3196	74.8708	0	16.9818	0	9.32879	1.96883	53.4519	28.6206	0	0	24.6959	0	0	920.721	4.44908	0	51.3804	15.8278	48.0738	20.9626	0	15.4675	188.113	0.992162	38.0081	2.99812	162.103	135.281	0.639459	0	0	51.9971	11.2665	8.75849	1.38111	0	0.959787	4.99822	10.2024	0	3.0932	126.953	1.72354	1.54851	0	7.67694	12.4951
GENUS_52	0	0	0	0	0	0	0	0	0	0	0	0	0	0	0	0	0	0	0	0	0	0	0	0	0	0	0	0	0	0	0	0	0	0	0	0	0	0	0	0	0	0	0	0	0	0	0	0	0
GENUS_53	5.59818	0	0	10.6235	0	0.776079	4.66439	0	0	0	5.60278	0	0	0	11.9985	0	0	0	4.2817	0	0	2.32917	0	1.71861	3.13522	0	11.149	0.499687	0	0	0.639459	0	0	0	0	0	17.0337	0	0	21.4924	2.78246	9.26539	44.3359	0	0.574512	8.77487	0.674398	0	0
GENUS_54	0	10.3168	0	0	0	136.59	0	0	22.0096	0	655.526	0	3.08698	0	0	0	0	0	0	0	0	0	0	0	0	0	0	0	0	132.207	0	0	16.6767	0	0	0	0	0	0	17.9936	0.927487	0	0	0	56.3022	4.64552	0	0	0
GENUS_55	115.696	0	0	0	0	0	0	0	0	0	0	0	0	0	0	0	0	0	0	0	0	0	0	0	0	0	0	0	0	0	0	0	2.08459	0	0	0	0	0	0	0	0	0	13.4039	0	0	0	0	0	21.4202
GENUS_56	5.59818	2.94766	2.13917	25.6736	7.27791	10.089	0	0	12.5769	13.1178	0	0	0	2.38702	17.9978	15.8745	56.7258	17.4619	0	0	16.9672	0	0	0	6.27044	13.8903	1.52032	0	0	0	4.47621	202.764	10.4229	84.736	3.0727	0	2.30185	4.26787	0	0	0	0	0	0	1.72354	0	0	0.639745	1.78502
GENUS_57	0	0	68.4533	0	0	0	0	0	3.14423	51.2785	0	0	0	81.1587	0	0	0	0	255.475	0	0	59.3939	0	0	6.27044	0	0	0	0	3.07458	1.27892	0	0	0	0	0	0	0	0	44.4842	0	66.402	0	0	0	0	0	0	1.78502
GENUS_58	0	5.89532	8.55667	0	7.27791	0	0	0	18.8654	0	0	5.22085	52.4787	9.54808	0	0	18.9086	0	12.8451	13.9657	11.3115	0	54.0287	30.9349	75.2453	20.8354	3.04065	13.4915	0	36.8949	0	0	0	23.1098	10.2423	24.3291	0.460369	0	1.91957	0	22.2597	0	90.7339	104.736	6.31963	1.54851	6.74398	0	12.4951
GENUS_59	0	0	6.4175	8.85295	19.4078	12.4173	0	0.984417	0	1.19252	0	8.35336	21.6089	4.77404	17.9978	5.2915	5.56135	7.48369	19.9813	7.44836	5.65574	45.4189	6.92675	0	3.13522	6.94513	0	0.999373	33.7714	3.07458	1.91838	13.8248	16.6767	13.4807	8.19385	0	2.76222	25.6072	7.1984	2.99893	6.49241	5.66218	1.03107	19.043	8.61768	9.29104	1.3488	0	0
GENUS_60	2.79909	2.94766	6.4175	0	9.70389	9.31294	0	0.984417	0	0	0	0	0	0	4.49945	0	0	0	2.85447	0.931045	2.82787	1.16459	2.7707	1.71861	0	0.992162	1.01355	0.999373	0	3.07458	1.91838	0	0	0	0	0	0	0	1.43968	4.99822	6.49241	34.4878	1.03107	0	5.17061	0	0	12.1552	0
GENUS_61	0	60.4271	0	0	0	0	0	0	0	0	0	0	0	0	0	0	0	0	125.597	0	0	0	0	0	0	0	0	0	0	0	0	0	0	0	0	0	0	0	0	0	0	0	0	0	0	45.4229	0	0	0
GENUS_62	14.9285	1.47383	0	0	0	0.776079	4.66439	1.96883	0	0	0	0	3.08698	0	0	0	0	0	0	16.7588	0	0	0	0	9.40566	2.97648	8.61517	0.499687	0	3.07458	0	0	0	0	0	0	0	14.2262	0	0.499822	0	0	0	0	0.574512	0	0	8.95643	0
GENUS_63	0	4.42149	23.5308	0	0	3.88039	0	1.96883	7.86058	0	0	0	9.26095	4.77404	8.9989	0	0	0	8.5634	1.86209	0	2.32917	6.92675	5.15582	0	0	0.506775	0	0	0	0	0	0	1.92582	0	0	0	8.53574	0	1.99929	0	0	15.466	0	2.29805	47.4875	0	3.83847	8.9251
GENUS_64	0	0	4.27833	0	0	0	0	0	0	0	0	0	0	0	0	0	0	0	0	0	0	0	0	0	0	0	0	0	0	3.07458	0	0	0	0	0	0	0	0	0	0	0	0	0	0	0	0	0	0	0
GENUS_65	0.93303	14.7383	32.0875	0	9.70389	0.776079	4.66439	0.984417	1.57212	7.15514	0	4.17668	6.17396	4.77404	8.9989	0	2.22454	2.49456	17.1268	5.58627	2.82787	6.98752	0	0	6.27044	0	0	0.499687	0	12.2983	0	0	2.08459	1.92582	1.53635	0	0	0	0	13.995	0	0	1.03107	0	0.574512	2.58084	6.74398	0	17.8502
GENUS_66	0	0	2.13917	0	0	0.776079	0	0	0	0	0	0	0	0	0	0	0	0	12.8451	0	0	0	0	0	0	0	0	0	0	0	0	0	0	0	0	0	0	0	0	0	0	0	0	0	8.61768	3.61318	14.1624	0	0
GENUS_67	0	0	0	0	0	0	0	0	0	0	8.40417	0	3.08698	0	0	0	0	0	0	0	0	0	1.38535	0	0	0	0	0	0	0	0	0	0	0	0	0	0	0	0	0	0	0	1.03107	0	0	0	0	0	0
GENUS_68	0	19.1598	0	0	0	0	0	0	26.726	9.54019	5.60278	0	0	0	0	0	2.22454	2.49456	0	0	0	0	0	0	0	0	0	0	0	0	0	0	0	0	0	0	0	0	0	0.499822	0	0	2.06213	0	0	0	19.5575	0.639745	0
GENUS_69	8.39727	1.47383	0	0	0	0	6.99659	0	0	0	0	0	0	0	0	0	0	0	0	0	0	0	5.5414	0	0	0	0	0	0	0	0	0	0	0	0	1.94633	0	0	0	0	2.78246	1.02949	36.0873	3.17383	0	0	0	0	0
GENUS_70	0	14.7383	0	0	0	18.6259	0	0	0	10.7327	0	0	15.4349	0	0	0	0	0	0	0	0	0	0	0	0	0	0	0	0	0	0	0	0	0	0	0	0	0	0	0	0	4.11795	8.24853	0	0	0	1.3488	0	0
GENUS_71	0	0	10.6958	0	0	111.755	0	0	106.904	193.189	0	0	0	9.54808	0	0	0	0	0	0	25.4508	83.8503	0	84.2117	94.0566	0	0	0	0	0	0	0	0	75.1069	0	0	0	0	0	0	0	0	0	0	0	0	0	0	60.6907
GENUS_72	0	1.47383	0	0	7.27791	6.20863	2.3322	0	4.71635	0	0	11.4859	0	0	0	0	0	0	4.2817	0	0	0	0	0	0	2.97648	0	1.99875	175.611	46.1186	0.639459	2.30414	39.6071	0	2.56058	5.83899	2.30185	38.4108	0.959787	0	0.927487	0	0	6.34765	0	0	0	0	0
GENUS_73	0	0	0	0	0	0	0	0	0	0	0	0	0	0	0	0	0	0	0	0	0	0	0	0	0	0	0	0	0	0	0	0	0	0	1.53635	0	0	0	0	0	0	0	0	0	0	0.516169	0	0.639745	0
GENUS_74	0	0	0	0	0	0	0	0	0	0	0	0	9.26095	0	0	0	0	0	0	0	0	0	0	0	0	0	0	0	0	0	0	0	0	0	0	0	0	0	0	0	0	0	0	34.9121	0	0	0	0	0
GENUS_75	0	0	0	0	0	0	0	0	0	0	0	0	0	0	0	0	0	0	0	0	0	0	0	0	0	0	0	0	0	0	0	0	0	0	0	0	0	0	0	0	0	0	0	0	0	0	0	0	0
GENUS_76	0	0	0	0	0	0	0	0	0	0	0	0	0	0	0	0	0	0	148.432	0	0	0	0	0	0	0	0	0	0	0	0	0	0	0	0	0	0	0	0	0	0	0	4.12427	0	0	0	0	1.91924	0
GENUS_77	0	0	2.13917	0	0	0	0	0.984417	0	2.38505	0	0	0	0	0	0	0	0	4.2817	0	0	0	1.38535	6.87443	0	0	0	0	0	3.07458	0	0	0	0	0	0	0	0	0	5.49805	4.63743	0	3.0932	0	0.574512	0	0	0.639745	5.35506
GENUS_78	0	0	0	0	0	0	0	0	0	0	0	0	0	0	0	0	0	0	0	0	0	0	0	0	0	0	0	0	0	0	0	0	0	0	0	0	0	0	0.959787	0	0	0	0	0	8.61768	0	1.3488	0	0
GENUS_79	0	1.47383	0	0.885295	0	0	0	0.984417	1.57212	0	0	0	0	0	0	0	0	0	0	0	0	0	0	0	0	7.93729	0	0	0	0	0	0	0	9.62909	0	0	0	0	0	0	0	0	0	0	0.574512	0	0	0	0
GENUS_80	0	0	0	0	0	0	0	0	0	0	0	0	18.5219	0	0	0	0	0	37.1081	0	0	0	0	0	0	0	0	0	0	0	0	0	0	0	0	0	0	0	0	0	0	0	0	0	0	0	0	0	0
GENUS_81	0	0	0	0	0	0	0	0	0	0	0	0	0	0	0	0	0	0	0	0	0	0	0	0	0	0	0	0	0	0	0	0	0	0	0	0	0	0	0	0	0	0	0	0	0	0	0	0	0
GENUS_82	0.93303	8.84299	0	0	0	0	0	0	3.14423	0	0	0	0	0	0	0	0	0	2.85447	0	0	0	0	5.15582	0	0	0	0	0	0	0	0	0	0	0	0	0	0	0	0	0	0	0	0	0	0	0	0	0
GENUS_83	0	11.7906	6.4175	0	0	0	0	0	1.57212	0	0	0	0	0	2.99963	0	0	0	0	0	0	0	0	3.43721	0	1.98432	0	0	0	3.07458	0	0	0	0	0	0	0	0	0	0	0	0	0	0	0	0	0	0	0
GENUS_84	0	0	0	0	0	0	0	0	0	0	0	0	0	0	0	0	0	0	0	0	0	0	0	0	0	0	0	0	0	0	0	0	0	0	0	0	0	0	0	0	0	0	0	0	0	0	0	0	0
GENUS_85	0	0	0	0	0	0	0	0	0	0	0	0	15.4349	0	0	0	0	0	0	0	0	0	0	0	0	0	0	0	0	76.8644	0	0	0	0	0	0	0	0	0	0	0	0	0	0	0	0	0	0	0
[truncated: 30 more columns]

## Sheet: 4 Clin Params
SampleID	SubjectID	Disease	Gender	Race	Country	Age	VAS	DAS28	TJ	SJ	Rheumnodules	RFtitre	RF	CCPtitre	CCP	ESR	CRP	Erosions	RAduration	Pred5	MTX15	NSAIDS	Opioids	Smoking	DRB1allele1	DRB1allele2	SE	PTPN22
HLT_0	Sample_001B_FE	HLT	M	Hisp	ARG	34	0	0	0	0	0	0	0	0	0	2	0	0	0	0	0	0	0	NEV	0.461111	0.543067	0	0
HLT_1	Sample_003B_FE	HLT	M	White	US	38	0	0	0	0	0	0	0	0	0	6	0	0	0	0	0	0	0	NEV	0.543067	0.543762	1	1
HLT_10	Sample_064B_FE	HLT	M	Hisp	PR	52	80	5.8	12	0	0	25	1	0	0	50	0	0	0	1	0	0	0	FOR	0.292361	0.417373	1	0
HLT_11	Sample_069B_FE	HLT	M	Hisp	Mex	31	0	0	0	0	0	0	0	0	0	0	0	0	0	0	0	0	0	FOR	NA	NA	NA	NA
HLT_12	Sample_070B_FE	HLT	F	Hisp	Brazil	43	15	2.59	0	0	0	51	1	0	0	30	0	0	0	0	0	1	0	NEV	NA	NA	NA	NA
HLT_13	Sample_087B_FE	HLT	F	Hisp	Ecuador	30	0	0	0	0	0	0	0	0	0	12	0	0	0	0	0	0	0	NEV	0.169456	0.584722	2	0
HLT_14	Sample_093B_FE	HLT	F	Hisp	DR	34	0	0	0	0	0	0	0	0	0	0	0	0	0	0	0	0	0	NEV	03:01/68N	0.620833	0	0
HLT_15	Sample_099B_FE	HLT	F	Hisp	PR	56	0	0	0	0	0	0	0	0	0	0	0	0	0	0	0	0	0	NEV	0.292361	0.543067	0	0
HLT_16	Sample_100B_FE	HLT	M	White	Switzerland	57	0	0	0	0	0	0	0	0	0	0	0	0	0	0	0	0	0	NEV	0.292361	07:01 (*)	0	0
HLT_17	Sample_101B_FE	HLT	F	Hisp	Spain	36	0	0	0	0	0	7	0	5	0	8	3	0	0	0	0	0	0	NEV	0.0423611	0.334028	1	0
HLT_18	Sample_147B_FE	HLT	F	White	USA	33	0	0	0	0	0	0	0	0	0	10	0	0	NA	0	0	0	0	NEV	03:01/68N	0.169456	1	NA
HLT_19	Sample_148B_FE	HLT	F	Hisp	PR	33	0	0	0	0	0	0	0	0	0	12	10	0	NA	0	0	0	0	FOR	0.417373	0.543762	2	NA
HLT_2	Sample_013B_FE	HLT	F	Asian	HongK	34	0	0	0	0	0	0	0	0	0	20	0	0	0	0	0	0	0	NEV	NA	NA	NA	0
HLT_20	Sample_150B_FE	HLT	F	Hisp	PR	62	1	0	6	0	0	0	0	0	0	12	16	0	NA	0	0	0	0	NEV	04:05 (*)	11:01 (*)	1	NA
HLT_21	Sample_169B_FE	HLT	F	Hisp	Mex	27	0	0	1	0	0	0	0	0	0	6	NA	0	NA	0	0	0	0	FOR	04:07/92	0.334722	0	NA
HLT_22	Sample_186B_FE	HLT	M	AA	USA	47	0	0	0	0	0	0	0	0	0	0	0	0	0	0	0	0	0	NEV	0.1264	0.459734	0	NA
HLT_23	Sample_187B_FE	HLT	F	Hisp	PR	22	0	0	0	0	0	0	0	0	0	0	0	0	0	0	0	0	0	NEV	0.1264	0.627083	0	NA
HLT_24	Sample_503A_FE	HLT	F	White	USA	43	90	0	0	0	0	492	1	258	1	0	0	0	0	0	0	1	0	CUR	0.167373	04:01 (*)	2	NA
HLT_25	Sample_505A_FE	HLT	F	White	USA	67	0	0	8	0	0	0	0	0	0	0	0	0	0	0	0	1	0	NEV	03:01/68N	0.292361	0	NA
HLT_26	Sample_507A_FE	HLT	F	White	USA	62	50	0	0	0	0	0	0	0	0	0	0	0	0	0	0	1	0	FOR	04:07/92	0.625694	0	NA
HLT_27	Sample_509A_FE	HLT	F	White	USA	49	0	0	0	0	0	0	0	0	0	0	0	0	0	0	NA	1	0	CUR	0.0423727	0.167373	2	NA
HLT_3	Sample_014B_FE	HLT	F	Hisp	DR	57	100	5.67	4	2	0	0	0	0	0	50	0	0	0	0	0	1	0	NEV	0.170139	0.338194	1	0
HLT_4	Sample_019B_FE	HLT	M	Asian	PAK	39	0	0	0	0	0	0	0	5	1	0	0	0	0	0	0	0	0	NEV	03:01/68N	0.543067	0	0
HLT_5	Sample_020B_FE	HLT	F	White	USA	41	0	0	0	0	0	0	0	0	0	10	0	0	0	0	0	0	0	NEV	0.292361	0.625694	0	0
HLT_6	Sample_025B_FE	HLT	F	White	USA	58	0	0	0	0	0	0	0	0	0	38	0	0	0	0	0	0	0	NEV	0.168067	0.292361	0	0
HLT_7	Sample_026B_FE	HLT	F	Hisp	Panama	49	0	0	0	0	0	0	0	0	0	5	0	0	0	0	0	0	0	NEV	0.292361	0.627083	0	0
HLT_8	Sample_045B_FE	HLT	F	Hisp	US	26	0	0	0	0	0	0	0	0	0	4	0	0	0	0	0	0	0	NEV	03:01/68N	0.627083	0	0
HLT_9	Sample_052B_FE	HLT	F	Hisp	Mex	39	0	0	0	0	0	0	0	0	0	11	0	0	0	0	0	0	0	NEV	0.292361	0.587512	0	0
MTX_0	Sample_032B_FE	CRA	F	Hisp	DR	59	70	5.58	11	8	0	22	1	0	0	16	6	1	9	0	1	0	0	NEV	03:01/68N	0.543067	0	0
MTX_1	Sample_033B_FE	CRA	F	AA	US	85	50	5.91	7	3	0	109	1	86	1	102	19	0	4	0	1	0	0	CUR	0.336111	11:01/97/100	0	0
MTX_2	Sample_036B_FE	CRA	F	Hisp	Mex	37	95	6.25	13	9	0	90	1	200	1	23	7	0	48	0	1	1	0	NEV	0.0423611	0.334722	1	0
MTX_3	Sample_047B_FE	CRA	F	Asian	US	25	20	2.89	1	3	0	29	1	200	1	14	0	0	7	0	1	1	0	NEV	0.33544	0.625694	0	0
MTX_4	Sample_075B_FE	CRA	F	Hisp	colombia	49	70	5.91	14	9	0	155	1	200	1	17	0	0	12	0	1	0	0	NEV	0.170139	0.584722	2	0
MTX_5	Sample_079B_FE	CRA	F	Hisp	Colom	57	90	5	4	0	1	299	1	53	1	42	0	0	35	0	1	0	0	NEV	11:01/97/100	0.625694	0	0
MTX_6	Sample_090B_FE	CRA	F	Hisp	DR	69	30	4.92	3	9	0	167	1	200	1	46	12	0	19	0	1	1	0	NEV	0.334028	0.543067	0	0
MTX_7	Sample_502A_FE	CRA	F	White	USA	43	70	4.29	6	2	0	258	1	233	1	9	0	0	48	0	1	0	0	FOR	0.167373	04:01 (*)	2	NA
MTX_8	Sample_504A_FE	CRA	F	White	USA	67	25	4.4	15	12	0	0	0	43	1	1	7.9	0	130	0	1	1	0	NEV	03:01/68N	0.292361	0	NA
NORA_0	Sample_004B_FE	NORA	M	AA	US	65	70	7.09	21	8	0	0	0	200	1	51	33.7	1	2	0	0	1	0	FOR	0.417373	0.459051	1	0
NORA_1	Sample_005B_FE	NORA	F	Hisp	Mex	27	100	6.45	12	10	0	219	1	9	1	17	20	0	2	0	0	1	0	NEV	0.167373	04:07/92	1	0
NORA_10	Sample_041B_FE	NORA	F	Hisp	Mex	26	50	3.97	6	1	0	694	1	8	1	10	0.19	0	2	0	0	1	0	NEV	04:07/92	0.334722	0	0
NORA_11	Sample_049B_FE	NORA	F	Hisp	Mex	49	80	5.88	7	6	0	219	1	200	1	40	20.74	0	2	0	0	1	0	NEV	0.170139	0.417373	2	0
NORA_12	Sample_053B_FE	NORA	F	White	Uzbek	39	40	4.54	1	8	0	74	1	19	1	42	5	0	4	0	0	0	0	NEV	0.334028	0.417373	1	0
NORA_13	Sample_056B_FE	NORA	F	Hisp	Mex	28	50	6.83	18	10	0	1050	1	179	1	34	18	0	4	0	0	1	0	NEV	03:01/68N	0.174306	0	0
NORA_14	Sample_067B_FE	NORA	M	Hisp	DR	40	50	4.31	3	6	0	157	1	21	1	16	0	0	23	0	0	1	0	NEV	03:01/68N	0.543067	0	1
NORA_15	Sample_068B_FE	NORA	M	Asian	Bangladesh	45	40	3.46	5	2	0	135	1	21	1	6	0	0	5	0	0	1	0	CUR	0.292361	11:01/97/100	0	0
NORA_16	Sample_072B_FE	NORA	F	Hisp	Mex	37	60	6.31	15	8	0	83	1	178	1	36	11	0	24	0	0	0	0	NEV	04:07/92	0.336123	0	0
NORA_17	Sample_078B_FE	NORA	M	African	Gambia	38	50	7.06	14	14	0	146	1	150	1	65	38	0	3	0	0	1	0	NEV	0.543762	0.668067	0	0
NORA_18	Sample_082B_FE	NORA	F	Hisp	Ecuador	29	90	4.62	18	0	0	83	1	13	1	5	12	0	7	0	0	0	0	NEV	0.167373	0.169456	2	0
NORA_19	Sample_088B_FE	NORA	F	Hisp	Mex	40	55	6.63	28	9	0	117	1	200	1	14	168	0	6	0	0	1	0	NEV	0.0423727	0.292361	1	0
NORA_2	Sample_009B_FE	NORA	M	Hisp	Mex	36	75	5.63	12	10	0	591	1	200	1	20	10	0	2	0	0	1	0	FOR	0.174306	0.584722	1	0
NORA_20	Sample_089B_FE	NORA	F	Hisp	Mex	56	50	5.54	4	6	1	266	1	49	1	75	8	1	12	0	0	1	0	NEV	0.236806	0.292361	0	0
NORA_21	Sample_103B_FE	NORA	F	Hisp	Mex	32	80	6.12	14	10	0	165	1	250	1	18	10.44	0	15	0	0	1	0	NEV	0.169444	0.625694	1	0
NORA_22	Sample_104B_FE	NORA	F	Asian	China	32	80	6.57	14	14	0	75	1	200	1	22	7	0	15	0	0	1	0	FOR	0.170139	0.375718	1	0
NORA_23	Sample_105B_FE	NORA	F	Hisp	Ecuador	29	0	0	0	0	0	59	1	200	1	20	4	0	1	0	0	0	0	0	0.668067	01 (*)	0	NA
NORA_24	Sample_107B_FE	NORA	M	Asian	Bangladesh	22	85	4.7	4	2	0	62	1	14	1	19	21	0	12	0	0	1	0	NEV	0.170139	0.292361	1	1
NORA_25	Sample_108B_FE	NORA	F	Hisp	Ecuador	45	10	7.25	27	16	0	271	1	200	1	82	41	0	3	0	0	1	0	NEV	0.0423611	0.626389	1	0
NORA_26	Sample_110B_FE	NORA	F	Hisp	DR	65	0	4.25	4	5	0	7	0	9	1	36	10	0	1	0	0	0	0	0	0.1264	0.292361	0	NA
NORA_27	Sample_112B_FE	NORA	F	White	USA	29	20	3.28	1	4	0	14	1	20	1	12	10	0	9	0	0	1	0	NEV	0.167373	0.169456	2	NA
NORA_28	Sample_126B_FE	NORA	M	Hisp	Ecuador	45	70	4.04	5	6	0	157	1	111	1	5	0	0	1	0	0	1	0	NEV	0.174306	0.668067	0	NA
NORA_29	Sample_128B_FE	NORA	F	Hisp	Mex	35	60	0	8	15	0	462	1	53	1	36	5	0	1	0	0	0	0	NEV	04:07/92	04:03 (*)	0	NA
NORA_3	Sample_012B_FE	NORA	F	Hisp	Mex	40	35	6.01	8	11	0	3000	1	200	1	80	27	1	2	0	0	0	0	NEV	0.169456	0.174306	1	0
NORA_30	Sample_140B_FE	NORA	F	Hisp	PERU	20	80	4.82	2	2	0	8	1	24	1	36	6	0	1	0	0	0	0	CUR	04:07/92	0.375718	0	NA
NORA_31	Sample_142B_FE	NORA	M	Hisp	PR	59	45	6.61	16	20	0	107	1	200	1	35	10.4	0	3	0	0	1	0	FOR	0.168067	0.336123	0	NA
NORA_32	Sample_144B_FE	NORA	F	Hisp	Mex	48	100	3.87	8	6	0	25	1	16	1	8	12	0	1	0	0	1	0	NEV	0.126412	0.544444	0	NA
NORA_33	Sample_170B_FE	NORA	F	Hisp	Mex	33	100	5.27	11	6	0	18	1	160	1	40	10.97	0	1	0	0	1	0	NEV	0.169444	0.625694	1	NA
NORA_34	Sample_172B_FE	NORA	F	White	Poland	57	40	4.83	8	4	0	8	1	114	1	23	1.38	0	1	0	0	1	0	FOR	0.292361	11:01/97/100	0	NA
NORA_35	Sample_174B_FE	NORA	F	AA	Africa	62	50	4.38	1	2	0	158	1	56	1	46	8.52	0	2	0	0	1	0	NEV	0.0430671	0.375718	1	NA
NORA_36	Sample_176B_FE	NORA	F	Hisp	Ecuador	71	35	5.19	8	6	0	1704	1	37	1	32	9.69	0	1	0	0	0	0	NEV	0.170139	0.668056	1	NA
NORA_37	Sample_178B_FE	NORA	F	Hisp	Guatemala	31	85	7.11	17	11	0	505	1	200	1	46	NA	0	2	0	0	0	0	NEV	03:01/68N	0.169456	1	NA
NORA_38	Sample_179B_FE	NORA	F	Polish	Poland	52	100	7.4	23	16	0	437	1	78	1	23	20	1	2	0	0	0	0	FOR	0.167373	0.620833	1	NA
NORA_4	Sample_016B_FE	NORA	M	Asian	Bangl	48	100	8.58	28	14	0	654	1	60	1	92	68.76	1	37	0	0	1	0	CUR	0.501389	0.626389	0	0
NORA_5	Sample_028B_FE	NORA	F	Hisp	Mex	24	80	6.27	6	11	0	39	1	200	1	47	32	0	2	0	0	0	0	FOR	0.167373	0.587512	1	0
NORA_6	Sample_030B_FE	NORA	F	Asian	CHINA	52	70	6.07	9	4	0	444	1	31	1	58	20	0	2	0	0	0	0	NEV	0.375718	0.6264	0	0
NORA_7	Sample_035B_FE	NORA	F	Hisp	Mex	29	55	5.48	14	7	0	38	1	66	1	16	0	0	2	0	0	1	0	NEV	04:07/92	0.587512	0	0
NORA_8	Sample_037B_FE	NORA	M	Asian	Nepal	30	45	6.04	12	12	0	150	1	10	1	43	72	1	2	0	0	1	0	NEV	0.375718	11:01/97/100	0	0
NORA_9	Sample_040B_FE	NORA	M	Hisp	DR	44	100	5.78	27	0	0	84	1	200	1	18	3.5	0	2	0	0	1	0	CUR	0.167373	0.627083	1	0
Prednisone_0	Sample_051B_FE	CRA	F	Hisp	Mex	27	70	4.2	1	8	0	195	1	200	1	21	1.7	0	42	1	0	1	0	NEV	0.587512	0.668067	0	0
Prednisone_1	Sample_094B_FE	CRA	M	Hisp	Ecuador	50	25	3.38	8	0	0	88	1	166	1	8	5	0	24	1	0	1	0	NEV	0.169456	0.174306	1	0
Prednisone_2	Sample_097B_FE	CRA	F	African	Malawi	27	30	5.41	8	6	0	59	1	130	1	54	24	0	22	1	0	0	0	NEV	0.167373	0.170139	2	1
PsA_0	Sample_011B_FE	PsA	F	Asian	Canada	60	30	4.14	7	2	0	0	0	0	0	14	0	0	0	0	0	1	0	NEV	NA	NA	NA	0
PsA_1	Sample_018B_FE	PsA	F	AA	US	49	50	4.57	13	3	0	36	1	25	1	7	18	0	0	0	0	1	0	FOR	0.417373	0.584722	2	0
PsA_10	Sample_077B_FE	PsA	F	White	Canada	32	30	3.23	4	4	0	0	0	0	0	14	24	0	0	0	0	0	0	NEV	0.292361	13:01/105/117	0	0
PsA_11	Sample_085B_FE	PsA	F	Asian	India	32	20	4.81	6	6	0	0	0	0	0	34	10	0	0	0	0	1	0	FOR	0.16875	0.461111	0	0
PsA_12	Sample_086B_FE	PsA	F	Hisp	Mexico	39	70	4.98	5	3	0	0	0	0	0	25	0	0	0	0	0	1	0	NEV	0.292361	0.334734	0	0
PsA_13	Sample_119B_FE	PsA	M	White	USA	33	40	3.14	3	0	0	0	0	0	0	10	0	0	12	0	0	1	0	FOR	0.292361	0.625694	0	NA
PsA_2	Sample_021B_FE	PsA	F	Hisp	Colom	41	80	4.88	9	2	0	0	0	0	0	11	17	0	0	0	0	1	0	NEV	03:01/68N	0.168067	0	0
PsA_3	Sample_031B_FE	PsA	M	Hisp	Colom	43	90	7.08	17	8	0	21	1	0	0	40	0	0	0	0	0	1	0	NEV	03:01/68N	04:07/92	0	0
PsA_4	Sample_043B_FE	PsA	M	Asian	EGY	40	80	7.34	24	8	0	0	0	0	0	46	0	0	0	0	0	1	0	NEV	03:01/68N	0.417373	1	0
PsA_5	Sample_055B_FE	PsA	M	White	US	50	20	4.52	5	8	0	0	0	0	0	23	15	0	0	0	0	0	0	NEV	0.0430671	0.168067	1	0
PsA_6	Sample_057B_FE	PsA	F	Hisp	PR	59	100	5.58	9	2	0	0	0	0	0	20	9.84	0	0	0	0	1	0	FOR	0.169456	0.459051	1	0
PsA_7	Sample_060B_FE	PsA	M	Asian	Bangladesh	73	0	2.96	2	3	0	0	0	0	0	11	0	0	0	0	0	0	0	NEV	0.292361	0.625694	0	0
PsA_8	Sample_062B_FE	PsA	F	Hisp	PR	52	40	5.69	11	10	0	0	0	0	0	16	0	0	0	0	0	1	0	FOR	0.0423727	0.292361	0	0
PsA_9	Sample_063B_FE	PsA	M	White	US	50	40	2.66	1	1	0	0	0	0	0	6	0	0	0	0	0	1	0	FOR	0.170833	0.625694	0	0
UCRA_0	Sample_008B_FE	CRA	F	Carib@Indian	Guay	63	100	6.31	10	0	0	0	0	0	0	92	15	1	95	0	0	1	0	NEV	0.417373	0.6264	1	0
UCRA_1	Sample_029B_FE	CRA	F	Carib@Indian	PR	80	60	5.16	3	8	0	1639	1	16	1	38	12	1	132	0	0	1	0	CUR	0.0430671	0.544444	1	0
UCRA_2	Sample_034B_FE	CRA	F	Hisp	Mex	41	50	4.04	1	1	0	0	0	29	1	20	25	0	33	0	0	0	0	NEV	04:07/92	0.587512	0	0
UCRA_3	Sample_071B_FE	CRA	F	Hisp	Peru	68	0	3.56	0	3	0	86	1	59	1	80	0	1	50	0	0	0	0	FOR	03:01/68N	0.668067	0	0
UCRA_4	Sample_073B_FE	CRA	F	Hisp	PR	31	70	4.78	3	2	0	128	1	38	1	32	18	1	132	0	0	1	0	NEV	0.417373	0.543762	2	0
UCRA_5	Sample_076B_FE	CRA	F	AA	US	55	80	5.2	11	1	0	11	1	0	0	16	0	0	221	0	0	0	0	NEV	0.1264	03:02 (*)	0	0
UCRA_6	Sample_084B_FE	CRA	F	White	Germany	33	65	6.06	14	8	1	327	1	55	1	25	11	0	84	0	0	1	0	NEV	0.167373	0.417373	2	0
UCRA_7	Sample_091B_FE	CRA	M	African	Nigeria	38	0	1.46	0	0	0	101	1	11	1	8	5	0	10	0	0	1	0	NEV	0.627083	15:03 (*)	0	0
UCRA_8	Sample_096B_FE	CRA	F	Hisp	PR	28	65	5.02	15	6	0	57	1	21	1	60	7	0	156	0	0	1	0	FOR	0.0423727	0.167373	2	0
UCRA_9	Sample_102B_FE	CRA	M	Hisp	PR	43	30	5.84	14	14	0	192	1	75	1	66	31	0	60	0	0	0	0	NEV	03:01/68N	0.167373	1	0
UCRA_10	Sample_508A_FE	CRA	F	White	USA	49	0	4.22	7	2	0	0	0	234	1	22	0	0	48	0	0	1	0	FOR	0.0423727	0.167373	2	NA
