# Supplementary material for: Dissection of the module network implementation “LemonTree”: enhancements towards applications in metagenomics and translation in autoimmune maladies
Source: Royal Society of Chemistry journal article supplement (doi:10.1039/c7mb00248c), 2017-07-26
Supplement: c7mb00248c3.pdf [file c7mb00248c3.pdf]

## Applications to GI microbiome data

### 1. GI microbime data preparation

We applied the newly defined LemonTree parameters recommendation on the GI microbiome data set from (Scher *et al.*, 2013). The representative sequences for each OTU and the OTU abundance table -with reads counts down to the genus classification- were downloaded from [https://github.com/polyatail/scher\\_et\\_al\\_2013/tree/master/16S\\_Analysis](https://github.com/polyatail/scher_et_al_2013/tree/master/16S_Analysis). The raw sequencing data were summarized at the genus level, with a taxonomy from phylum to genus to well annotate the unclassified genera, and TMM normalized (Robinson and Oshlack, 2010). The abundance was further filtered by eliminating low abundance (average counts < 1) and low variance (SD < 0.5) microbes. The differential microbes were identified with LIMMA differential analysis, with the following criteria: i) summed abundance > 5; ii) expressed in at least 3 samples; iii) *p*-value < 0.05 and FC > 2. Finally, the expressions of the regulated and candidate regulator microbes were normalized to be zero centered with SD = 1. The taxonomical annotation can be found in Data S2, Sheet 1. The raw and TMM normalized counts are in Data S2, Sheet 2-3.

### 2. Clinical parameters analyses

The clinical parameters are in Data S2, Sheet 4.

#### 2.1 Association of the clinical parameters with the left/right branches

**Table S3-1. Fisher's exact test and t-test for the categorical and quantitative clinical parameters.**

|                                      |              | left vs right (all MTX,<br>Prednisone)<br><i>p</i> -value | left vs right (MTX only)<br><i>p</i> -value |
|--------------------------------------|--------------|-----------------------------------------------------------|---------------------------------------------|
| Categorical<br>(Fisher's exact test) | Disease      | 1                                                         | 1                                           |
|                                      | Gender       | 1                                                         | 1                                           |
|                                      | Race         | 0.17803                                                   | 0.52381                                     |
|                                      | Country      | 0.272727                                                  | 0.428571                                    |
|                                      | Rheumnodules | 0.416667                                                  | 1                                           |
|                                      | RF           | 0.416667                                                  | 1                                           |
|                                      | CCP          | 1                                                         | 0.444444                                    |
|                                      | Erosions     | 1                                                         | 0.444444                                    |
|                                      | Pred5        | 0.204545                                                  |                                             |
|                                      | MTX15        | 0.204545                                                  | 1                                           |
|                                      | NSAIDS       | 1                                                         | 1                                           |
|                                      | Opioids      | NA                                                        | NA                                          |
|                                      | Smoking      | 0.681818                                                  | 1                                           |
|                                      | SE           | 0.575758                                                  | 0.444444                                    |
| PTPN22                               | 1            | 1                                                         |                                             |

|                          |            |          |          |
|--------------------------|------------|----------|----------|
| Quantitative<br>(t-test) | Age        | 0.832069 | 0.29089  |
|                          | VAS        | 0.902995 | 0.759054 |
|                          | DAS28      | 0.367704 | 0.08511  |
|                          | TJ         | 0.829908 | 0.892044 |
|                          | SJ         | 0.729509 | 0.471898 |
|                          | RFtitre    | 0.520543 | 0.47267  |
|                          | CCPtitre   | 0.914051 | 0.713257 |
|                          | ESR        | 0.152631 | 0.223164 |
|                          | CRP        | 0.028144 | 0.041189 |
|                          | RAduration | 0.378784 | 0.322728 |

## 2.2 PCA analysis of the clinical parameters

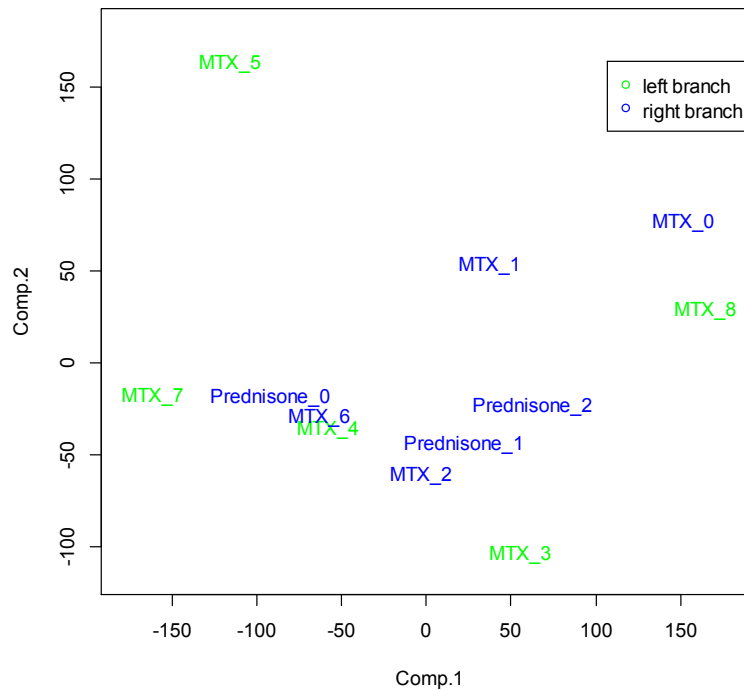

**Fig S3-1. PCA plot of the clinical parameters (MTX, Prednisone).**

## 3. LemonTree parameters

The regulator candidates are the differential microbes from the NORA-HLT comparison; the regulated candidates are all microbes but these candidates to avoid self-regulation; the samples are patients in the MTX and Prednisone treatment groups. LemonTree input parameters are:

- 1)  $nc = 30$ ;
- 2)  $nreg = reg = 14$  ("GENUS\_71" filtered as low abundance in {MTX, Prednisone});
- 3)  $perc = 70\%$ .

**Table S3-2. Candidate regulator microbes.**

| ID       | Annotation (kingdom;phylum;class;order;family;genus)                                        |
|----------|---------------------------------------------------------------------------------------------|
| GENUS_1  | Bacteria;Bacteroidetes;Bacteroidia;Bacteroidales;Prevotellaceae;Prevotella                  |
| GENUS_4  | Bacteria;Firmicutes;Clostridia;Clostridiales;Lachnospiraceae;Roseburia                      |
| GENUS_7  | Bacteria;Bacteroidetes;Bacteroidia;Bacteroidales;Rikenellaceae;Alistipes                    |
| GENUS_8  | Bacteria;Firmicutes;Clostridia;Clostridiales;Veillonellaceae;Phascolarctobacterium          |
| GENUS_9  | Bacteria;Firmicutes;Clostridia;Clostridiales;Ruminococcaceae;Faecalibacterium               |
| GENUS_10 | Bacteria;Bacteroidetes;Bacteroidia;Bacteroidales;Prevotellaceae;unclassified                |
| GENUS_15 | Bacteria;Bacteroidetes;Bacteroidia;Bacteroidales;Prevotellaceae;unclassified_Prevotellaceae |
| GENUS_16 | Bacteria;Firmicutes;Clostridia;Clostridiales;Veillonellaceae;Dialister                      |
| GENUS_24 | Bacteria;Firmicutes;Clostridia;Clostridiales;Veillonellaceae;unclassified                   |
| GENUS_32 | Bacteria;Firmicutes;Erysipelotrichi;Erysipelotrichales;Erysipelotrichaceae;Catenibacterium  |
| GENUS_43 | Bacteria;Proteobacteria;unclassified;unclassified;unclassified;unclassified                 |
| GENUS_48 | Bacteria;Proteobacteria;Gammaproteobacteria;Pasteurellales;Pasteurellaceae;Haemophilus      |
| GENUS_53 | Bacteria;Firmicutes;Erysipelotrichi;Erysipelotrichales;Erysipelotrichaceae;Coprobacillus    |
| GENUS_56 | Bacteria;Firmicutes;Clostridia;Clostridiales;Veillonellaceae;Veillonella                    |

**Table S3-3. Modules and member microbes generated from tight clustering.**

| ID       | Annotation (kingdom;phylum;class;order;family;genus)                                                   |
|----------|--------------------------------------------------------------------------------------------------------|
| GENUS_33 | Bacteria;Firmicutes;Clostridia;Clostridiales;Ruminococcaceae;unclassified_Ruminococcaceae              |
| GENUS_5  | Bacteria;Bacteroidetes;Bacteroidia;Bacteroidales;Porphyromonadaceae;Parabacteroides                    |
| GENUS_17 | Bacteria;Proteobacteria;Betaproteobacteria;Burkholderiales;Burkholderiales_incertae_sedis;unclassified |
| GENUS_65 | Bacteria;Firmicutes;Clostridia;Clostridiales;Incertae_Sedis_XIII;Anaerovorax                           |
| GENUS_11 | Bacteria;Firmicutes;unclassified;unclassified;unclassified;unclassified                                |
| GENUS_2  | Bacteria;Firmicutes;Clostridia;Clostridiales;Ruminococcaceae;unclassified                              |
| GENUS_26 | Bacteria;Proteobacteria;Gammaproteobacteria;Enterobacteriales;Enterobacteriaceae;unclassified          |
| GENUS_18 | Bacteria;Proteobacteria;Betaproteobacteria;Burkholderiales;Alcaligenaceae;Parasutterella               |
| GENUS_31 | Bacteria;Firmicutes;Bacilli;Lactobacillales;Streptococcaceae;Streptococcus                             |
| GENUS_3  | Bacteria;Firmicutes;Clostridia;Clostridiales;Lachnospiraceae;unclassified                              |
| GENUS_58 | Bacteria;Firmicutes;Clostridia;Clostridiales;Ruminococcaceae;Ruminococcus                              |
| GENUS_20 | Bacteria;Firmicutes;Clostridia;Clostridiales;Lachnospiraceae;Coprococcus                               |
| GENUS_22 | Bacteria;Firmicutes;Clostridia;Clostridiales;Incertae_Sedis_XIV;Blautia                                |
| GENUS_44 | Bacteria;Actinobacteria;Actinobacteria;Coriobacteriales;Coriobacteriaceae;Collinseilla                 |

|          |                                                                                                       |
|----------|-------------------------------------------------------------------------------------------------------|
| GENUS_6  | Bacteria;Firmicutes;Clostridia;Clostridiales;Lachnospiraceae;unclassified_Lachnospiraceae             |
| GENUS_27 | Bacteria;Proteobacteria;Betaproteobacteria;Burkholderiales;unclassified;unclassified                  |
| GENUS_63 | Bacteria;Firmicutes;Clostridia;Clostridiales;Incertae_Sedis_XIII;unclassified                         |
| GENUS_35 | Bacteria;Firmicutes;Clostridia;Clostridiales;Peptostreptococcaceae;Sporacetigenium                    |
| GENUS_60 | Bacteria;Proteobacteria;Deltaproteobacteria;Desulfovibrionales;Desulfovibrionaceae;unclassified       |
| GENUS_28 | Bacteria;Firmicutes;Clostridia;Clostridiales;Veillonellaceae;Megasphaera                              |
| GENUS_13 | Bacteria;Firmicutes;Clostridia;Clostridiales;Ruminococcaceae;Oscillibacter                            |
| GENUS_41 | Bacteria;Firmicutes;Clostridia;Clostridiales;Peptostreptococcaceae;unclassified_Peptostreptococcaceae |
| GENUS_30 | Bacteria;Firmicutes;Clostridia;Clostridiales;unclassified;unclassified                                |
| GENUS_12 | Bacteria;unclassified;unclassified;unclassified;unclassified;unclassified                             |
| GENUS_69 | Bacteria;Firmicutes;unclassified_Firmicutes;unclassified;unclassified;unclassified                    |
| GENUS_42 | Bacteria;Bacteroidetes;Bacteroidia;Bacteroidales;unclassified;unclassified                            |
| GENUS_59 | Bacteria;Firmicutes;Clostridia;Clostridiales;Ruminococcaceae;Butyricoccus                             |
| GENUS_40 | Bacteria;Firmicutes;Clostridia;Clostridiales;unclassified_Clostridiales;unclassified                  |
| GENUS_14 | Bacteria;Bacteroidetes;unclassified;unclassified;unclassified;unclassified                            |
| GENUS_19 | Bacteria;Firmicutes;Clostridia;Clostridiales;Ruminococcaceae;Subdoligranulum                          |
| GENUS_36 | Bacteria;Firmicutes;Clostridia;Clostridiales;Lachnospiraceae;Dorea                                    |

Here only one module (namely, mod\_0) is generated.

**Table S3-4. Assigned regulators (full list) to mod\_0, with 10 instantiations.**

| Instantiation No. | Full list of assigned regulators | Corresponding scores |
|-------------------|----------------------------------|----------------------|
| 0                 | GENUS_4                          | 14.975940            |
|                   | GENUS_56                         | 1.760507             |
|                   | GENUS_9                          | 0.568363             |
|                   | GENUS_7                          | 0.522100             |
| 1                 | GENUS_4                          | 16.307376            |
|                   | GENUS_7                          | 12.704342            |
|                   | GENUS_1                          | 4.416815             |
|                   | GENUS_56                         | 2.793968             |
|                   | GENUS_53                         | 2.283879             |
|                   | GENUS_9                          | 2.259406             |
|                   | GENUS_48                         | 1.086739             |
|                   | GENUS_43                         | 1.059463             |
| 2                 | GENUS_4                          | 17.259483            |
|                   | GENUS_9                          | 5.056355             |
|                   | GENUS_7                          | 4.725685             |
|                   | GENUS_56                         | 2.263539             |
|                   | GENUS_43                         | 2.118926             |
|                   | GENUS_48                         | 1.110911             |

|   |          |           |
|---|----------|-----------|
|   | GENUS_53 | 1.044111  |
| 3 | GENUS_4  | 23.537581 |
|   | GENUS_7  | 6.926109  |
|   | GENUS_9  | 5.635548  |
|   | GENUS_56 | 3.459837  |
|   | GENUS_1  | 2.208408  |
|   | GENUS_43 | 1.589195  |
| 4 | GENUS_4  | 16.400015 |
|   | GENUS_7  | 2.871188  |
|   | GENUS_9  | 1.686254  |
|   | GENUS_48 | 1.642194  |
|   | GENUS_43 | 1.589195  |
|   | GENUS_56 | 1.172308  |
| 5 | GENUS_4  | 23.201447 |
|   | GENUS_56 | 4.645876  |
|   | GENUS_7  | 2.978694  |
|   | GENUS_9  | 2.802565  |
|   | GENUS_48 | 1.079636  |
|   | GENUS_43 | 0.529732  |
| 6 | GENUS_4  | 25.109613 |
|   | GENUS_7  | 6.433786  |
|   | GENUS_9  | 5.010833  |
|   | GENUS_56 | 2.912710  |
|   | GENUS_43 | 2.118926  |
|   | GENUS_53 | 0.619612  |
|   | GENUS_1  | 0.561231  |
|   | GENUS_8  | 0.513344  |
| 7 | GENUS_4  | 14.114425 |
|   | GENUS_7  | 8.140855  |
|   | GENUS_9  | 3.383109  |
|   | GENUS_56 | 2.352057  |
|   | GENUS_48 | 2.212690  |
|   | GENUS_43 | 1.589195  |
|   | GENUS_53 | 1.043700  |
|   | GENUS_1  | 0.524715  |
| 8 | GENUS_4  | 14.982218 |
|   | GENUS_56 | 4.673217  |
|   | GENUS_9  | 2.805546  |
|   | GENUS_7  | 1.761598  |
|   | GENUS_43 | 1.589195  |
| 9 | GENUS_4  | 13.193747 |
|   | GENUS_56 | 1.760507  |
|   | GENUS_8  | 1.033015  |
|   | GENUS_9  | 0.551741  |

|  |          |          |
|--|----------|----------|
|  | GENUS_48 | 0.531283 |
|  | GENUS_7  | 0.522100 |

The choice for *perc* = 70% is made according to our conclusion from synthetic data that *perc* ≥ 30% can warrant good TPR (sensitivity), in this range 70% is the minimum value for a decent stability (≥ 80%). It thus ensures to obtain both stringency (100% stable microbe *Roseburia*) and flexibility (other two relatively stable microbes, *Veillonella* and *Faecalibacterium*).

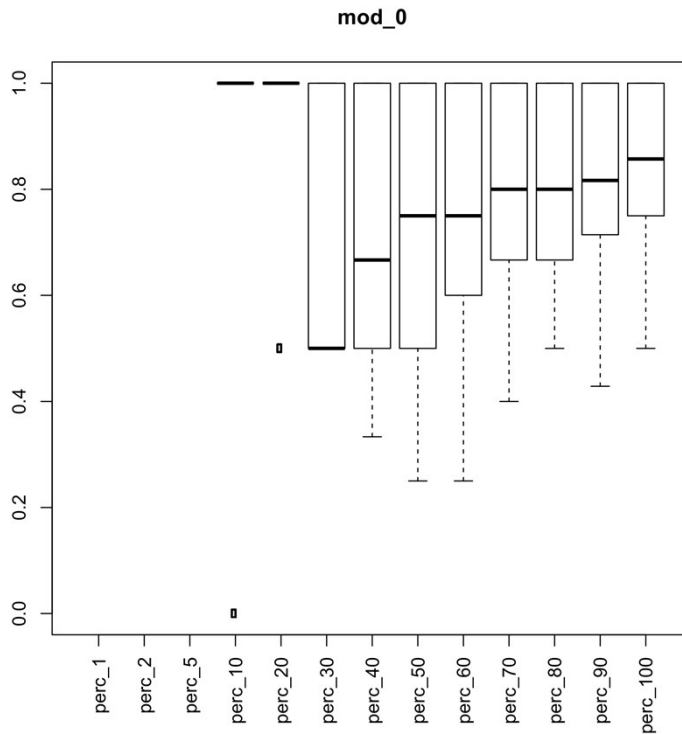

**Fig S3-2. Regulators stability as LemonTree parameter *perc* varies.**

Note: *perc* = 1 or 2 outputs no regulators due to the generally short length of the full list for each instantiation (4~8). LemonTree indeed generates empty files for the default top regulator setting (*perc* = 1%).

#### 4. Community structure and Firmicutes/Bacteroides ratio analysis for the LemonTree results

#### 4.1 Phylum community structure analysis

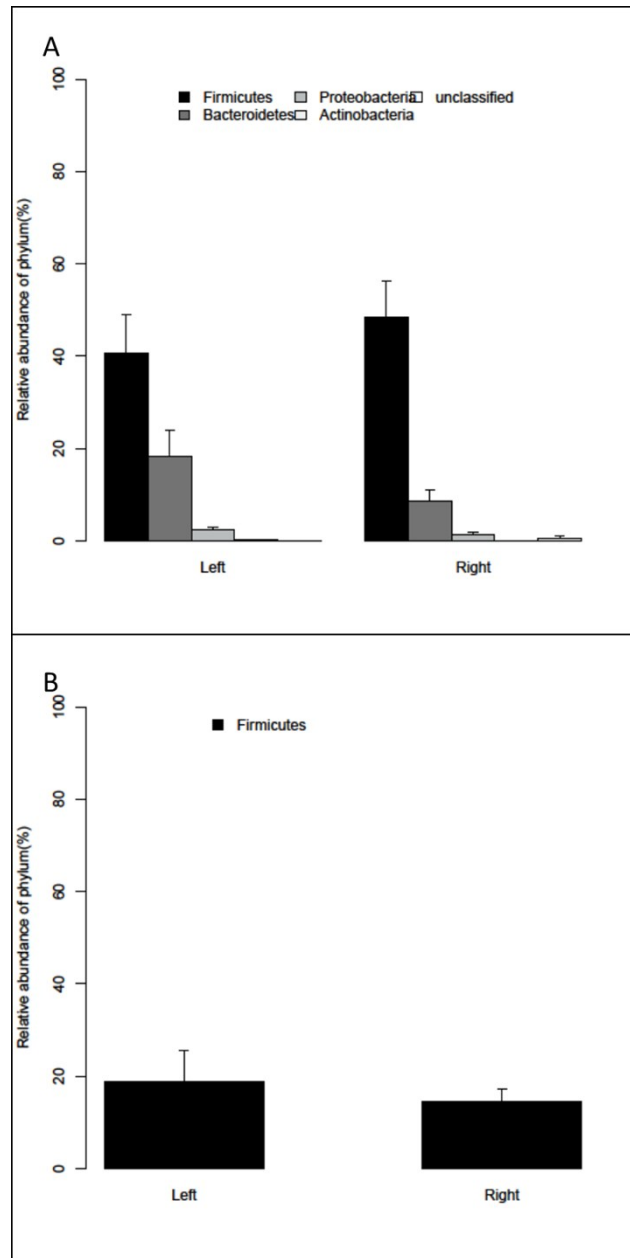

Fig S3-3. Phylum community structure in module (A) and assigned regulator (B) microbes in the left/right branches.

#### 4.2 Firmicutes/Bacteriodes ratio analyses

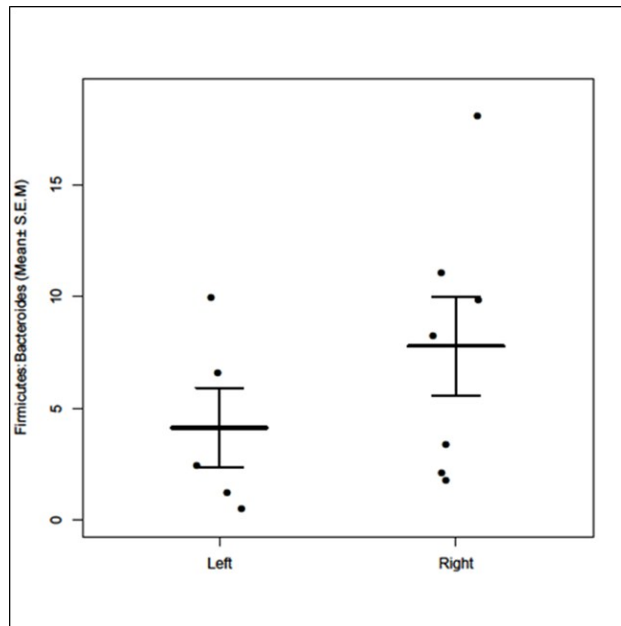

**Fig S3-4. Firmicutes to Bacteroides ratios in left and right grouped samples of the module. No Bacteroides phylum in regulators.**

**Table S3-5. Phylum structure in module microbes.**

| Taxa           | Left_MEAN | Right_MEAN | Left_SEM | Right_SEM |
|----------------|-----------|------------|----------|-----------|
| Firmicutes     | 40.59305  | 48.60127   | 8.527221 | 7.660571  |
| Bacteroidetes  | 18.21999  | 8.615841   | 5.792842 | 2.322657  |
| Proteobacteria | 2.509126  | 1.303909   | 0.545723 | 0.563968  |
| Actinobacteria | 0.249582  | 0.034856   | 0.127894 | 0.028145  |
| unclassified   | 0.078605  | 0.616817   | 0.044057 | 0.415848  |

**Table S3-6. Phylum structure in regulator microbes.**

| Taxa       | Left_MEAN | Right_MEAN | Left_SEM | Right_SEM |
|------------|-----------|------------|----------|-----------|
| Firmicutes | 14.81649  | 7.445971   | 6.626134 | 2.814312  |

**Table S3-7. Firmicutes/Bacteroides ratio of samples in module mod\_0.**

| SampleID | Firmicutes/Bacteroides | Branch |
|----------|------------------------|--------|
| MTX_3    | 1.222222               | Left   |
| MTX_4    | 2.442402               | Left   |
| MTX_5    | 0.501488               | Left   |
| MTX_7    | 9.926471               | Left   |
| MTX_8    | 6.585657               | Left   |
| MTX_0    | 9.841432               | Right  |
| MTX_1    | 2.128904               | Right  |



|              |          |       |
|--------------|----------|-------|
| MTX_2        | 11.05805 | Right |
| MTX_6        | 18.06897 | Right |
| Prednisone_0 | 8.24821  | Right |
| Prednisone_1 | 1.781481 | Right |
| Prednisone_2 | 3.379108 | Right |

## Reference

- Robinson,M.D. and Oshlack,A. (2010) A scaling normalization method for differential expression analysis of RNA-seq data. *Genome Biol.*, **11**, R25.
- Scher,J.U. *et al.* (2013) Expansion of intestinal *Prevotella copri* correlates with enhanced susceptibility to arthritis. *eLife*, **2**.
