# Supplementary material for: Dissection of the module network implementation “LemonTree”: enhancements towards applications in metagenomics and translation in autoimmune maladies
Source: Royal Society of Chemistry journal article supplement (doi:10.1039/c7mb00248c), 2017-07-26
Supplement: c7mb00248c4.pdf [file c7mb00248c4.pdf]

### **LemonTree performance benchmarks**

#### 1. AUC analysis of the regulators performance using synthetic data

The following figure report on analyses that condense more than the 2 dimensions of the Cartesian plane, up to 5 variables. All variables are described in the legend and a brief discussion on the emerging trend is given. The AUC and ROC plots are produced by the R package "ROCR", v1.0-7 (Sing *et al.*, 2005) .

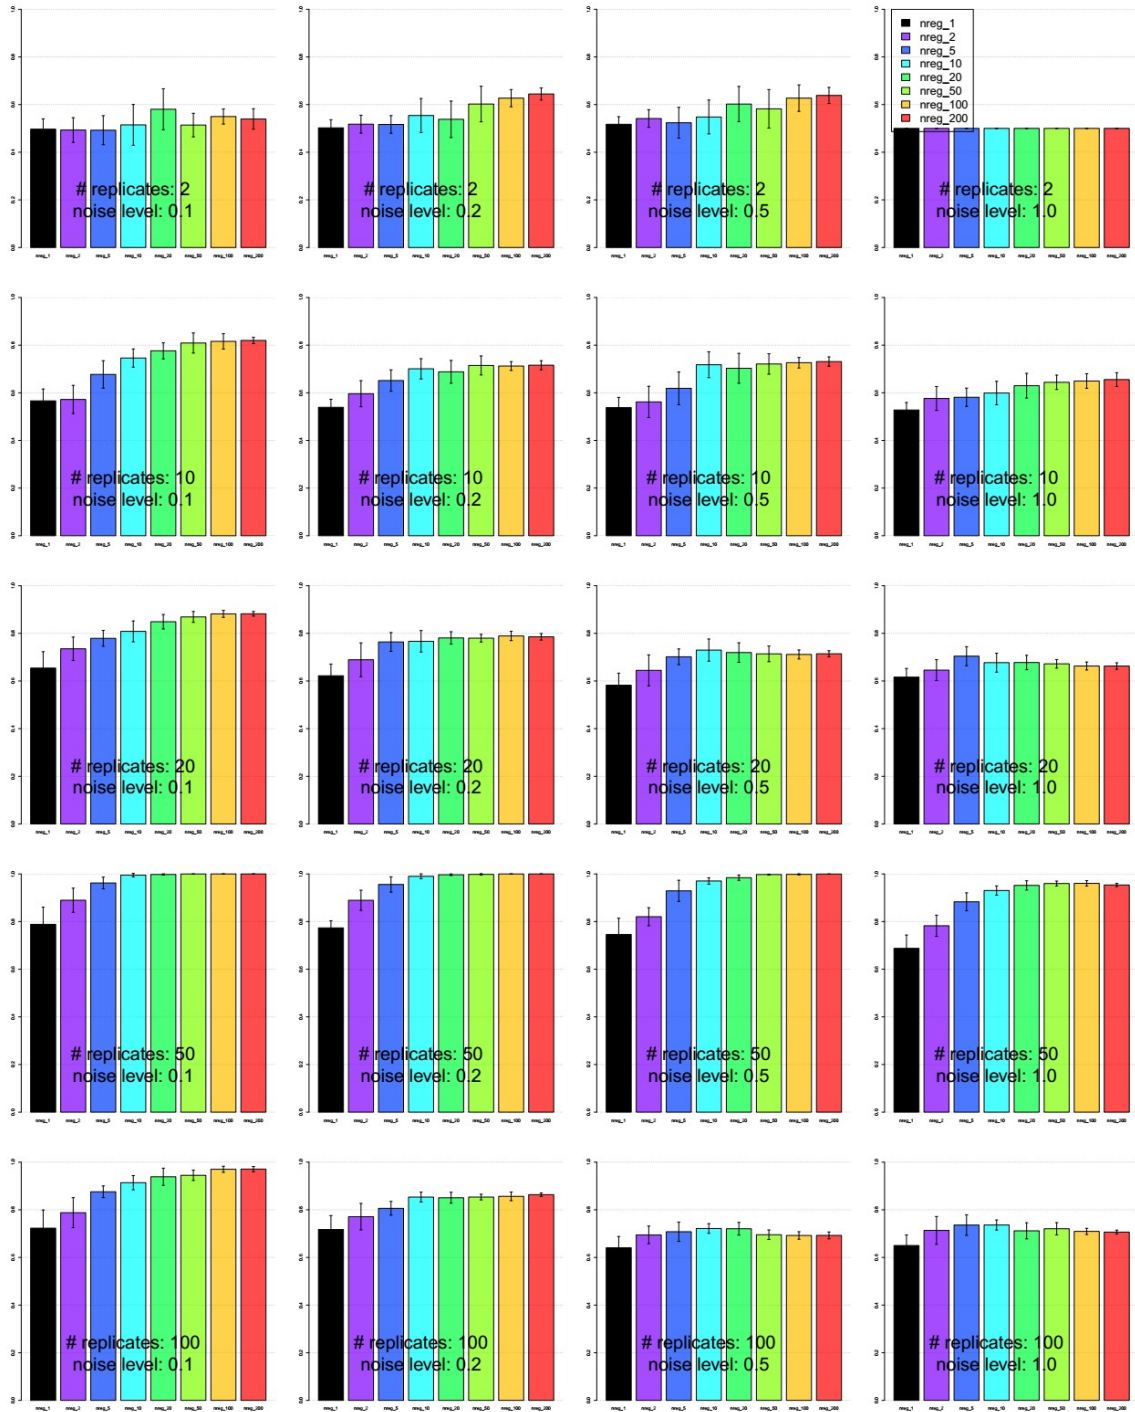

**Fig S4-1. AUCs of the “random regulator lists”.** Rows *bn*, columns *nreplicate*. For each subfigure, *y*-axis AUC, *x*-axis, colors *nreg*.

Fig S4-1 shows that AUCs of the random assigned regulators are generally above 0.5, though lower than their non-random counterparts.

## 2. ROC analysis of the regulator performance using synthetic data

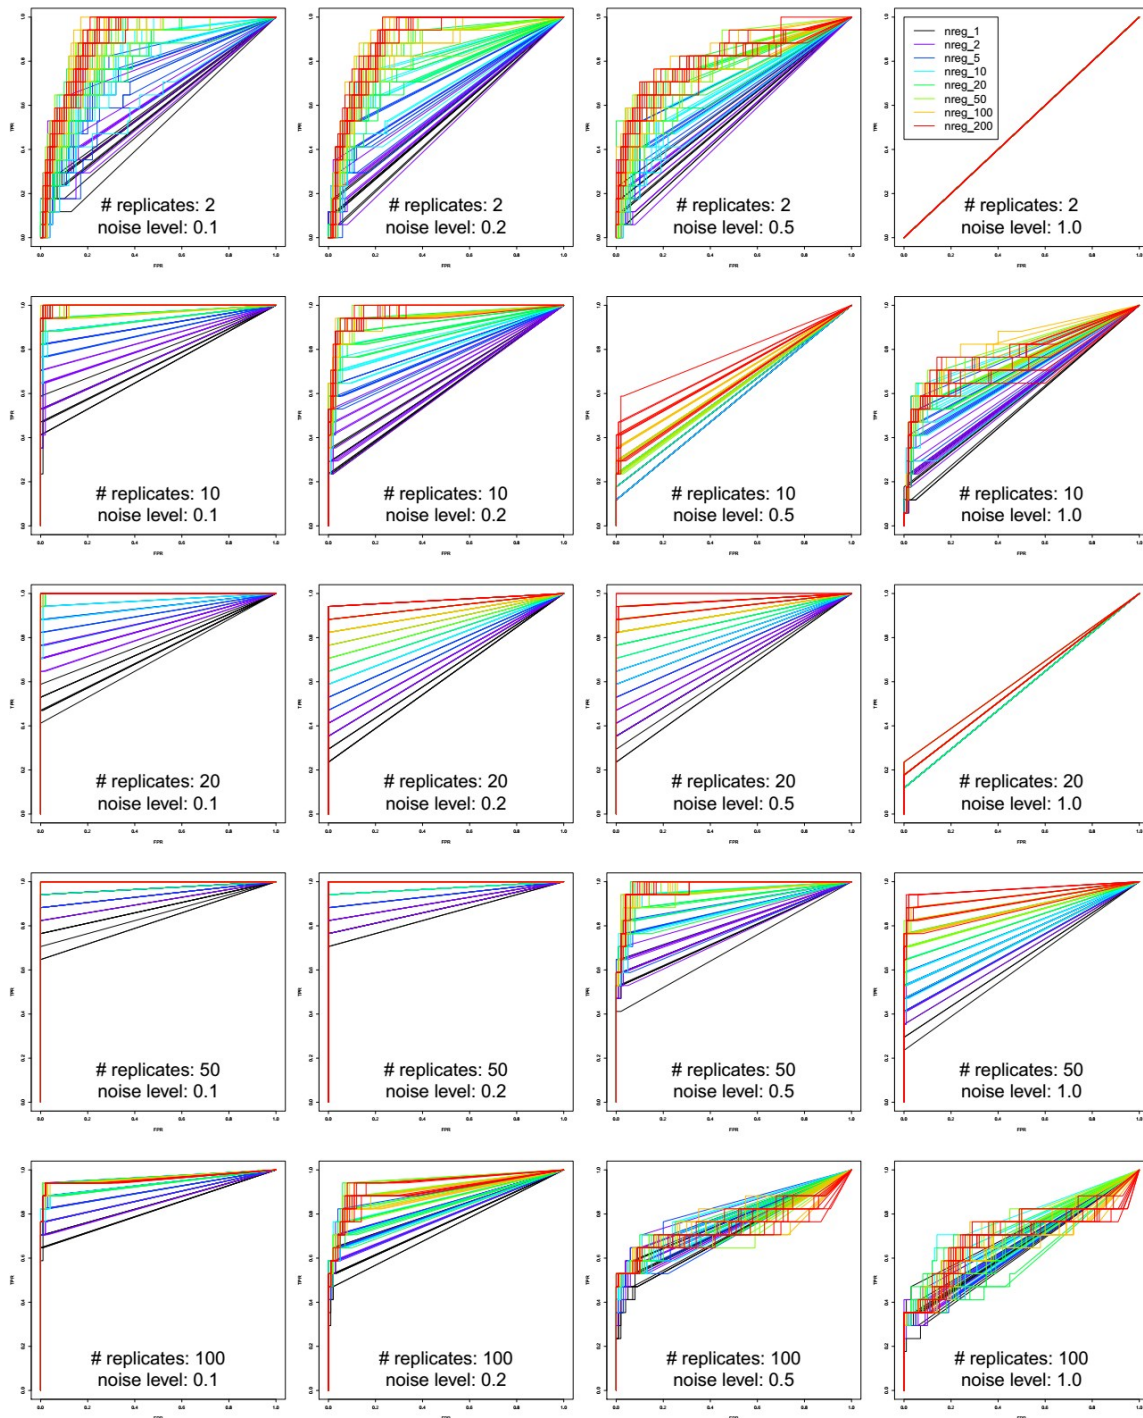

**Fig S4-2. ROC curves (TPR-FPR) of regulators assignment.** Rows:  $bn$ , columns:  $n_{replicate}$ ; for each subfigure, x-axis FPR, y-axis TPR, colors  $n_{reg}$ .

Fig S4-2 depicts LemonTree's decent sensitivity-specificity performance, except for a few high noise applications.

Note, the  $nreplicate = 2$ ,  $bn = 1.0$  data set displays a linear line, because no regulatory tree was obtained, possibly due to the extremely high noise and small sample size.

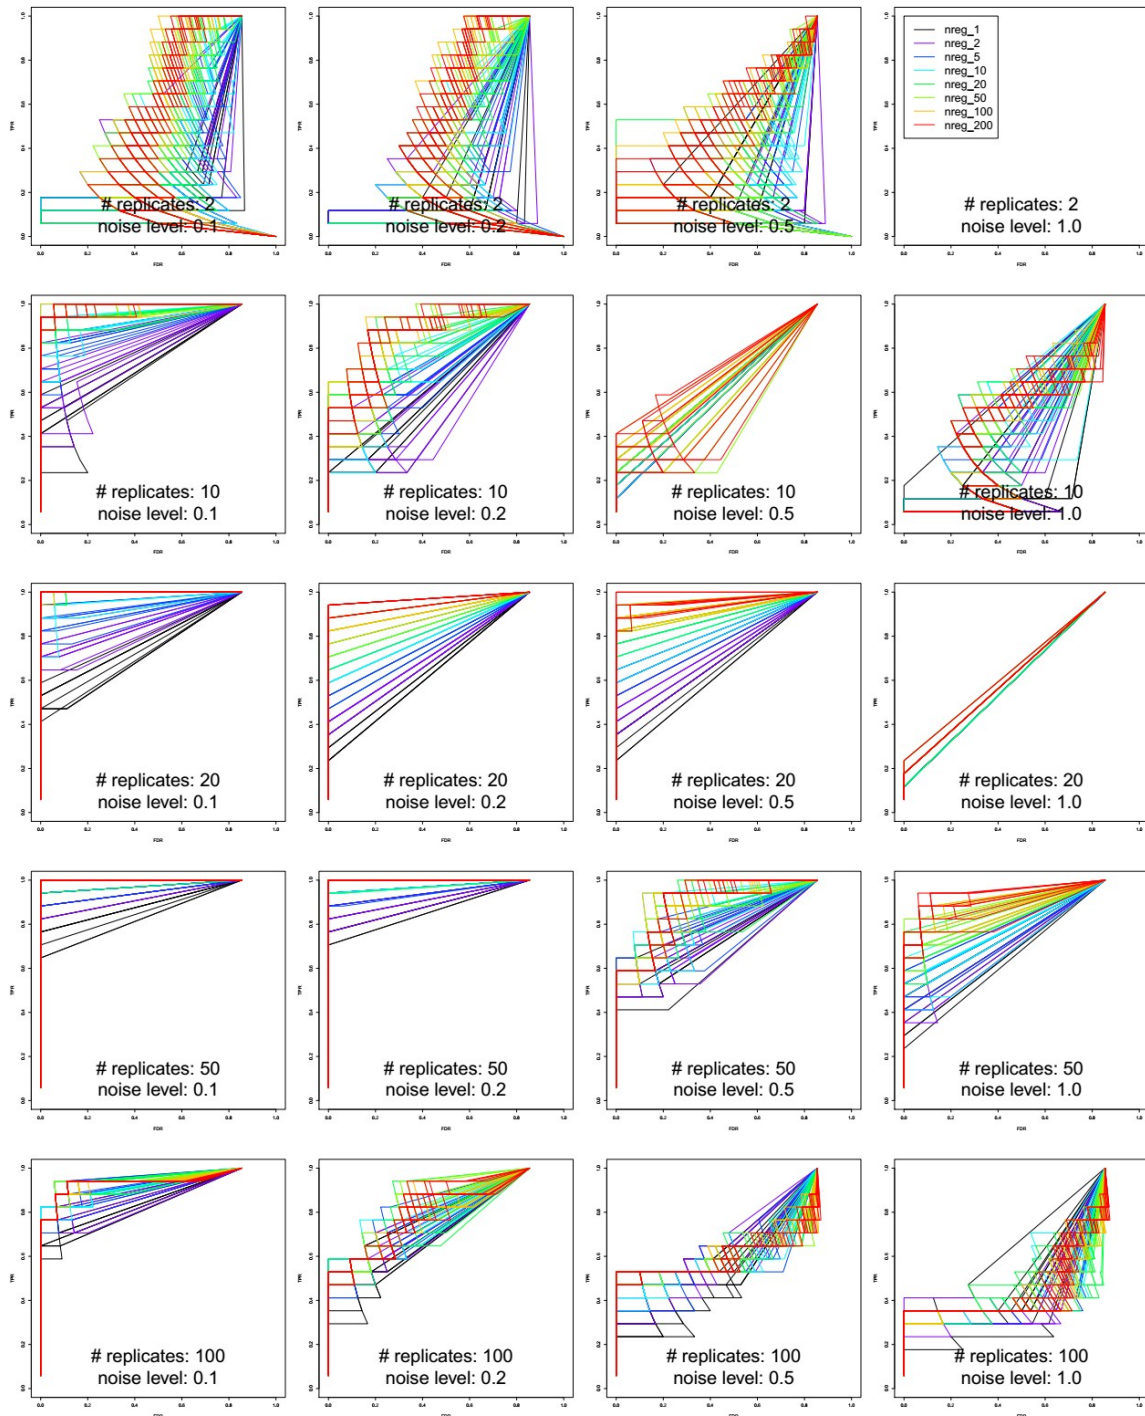

**Figure S4-3. ROC curves (TPR-FDR) of regulators assignment. Rows:  $bn$ , columns:  $nreplicate$ ; for each subfigure, x-axis FPR, y-axis TPR, colors  $nreg$ .**

In contrast to generally good TPR-FPR performance, TPR-FDR curves in Fig S4-4 raises caution for LemonTree's application in small sample sized data. Nevertheless, applying LemonTree to data with 20~50 replicates and a modest noise level ( $bn < 0.2$ ) should be fine.

### 3. Dependence of TPR and FDR on $bn$ , $nreplicate$ , $nreg$ using synthetic data

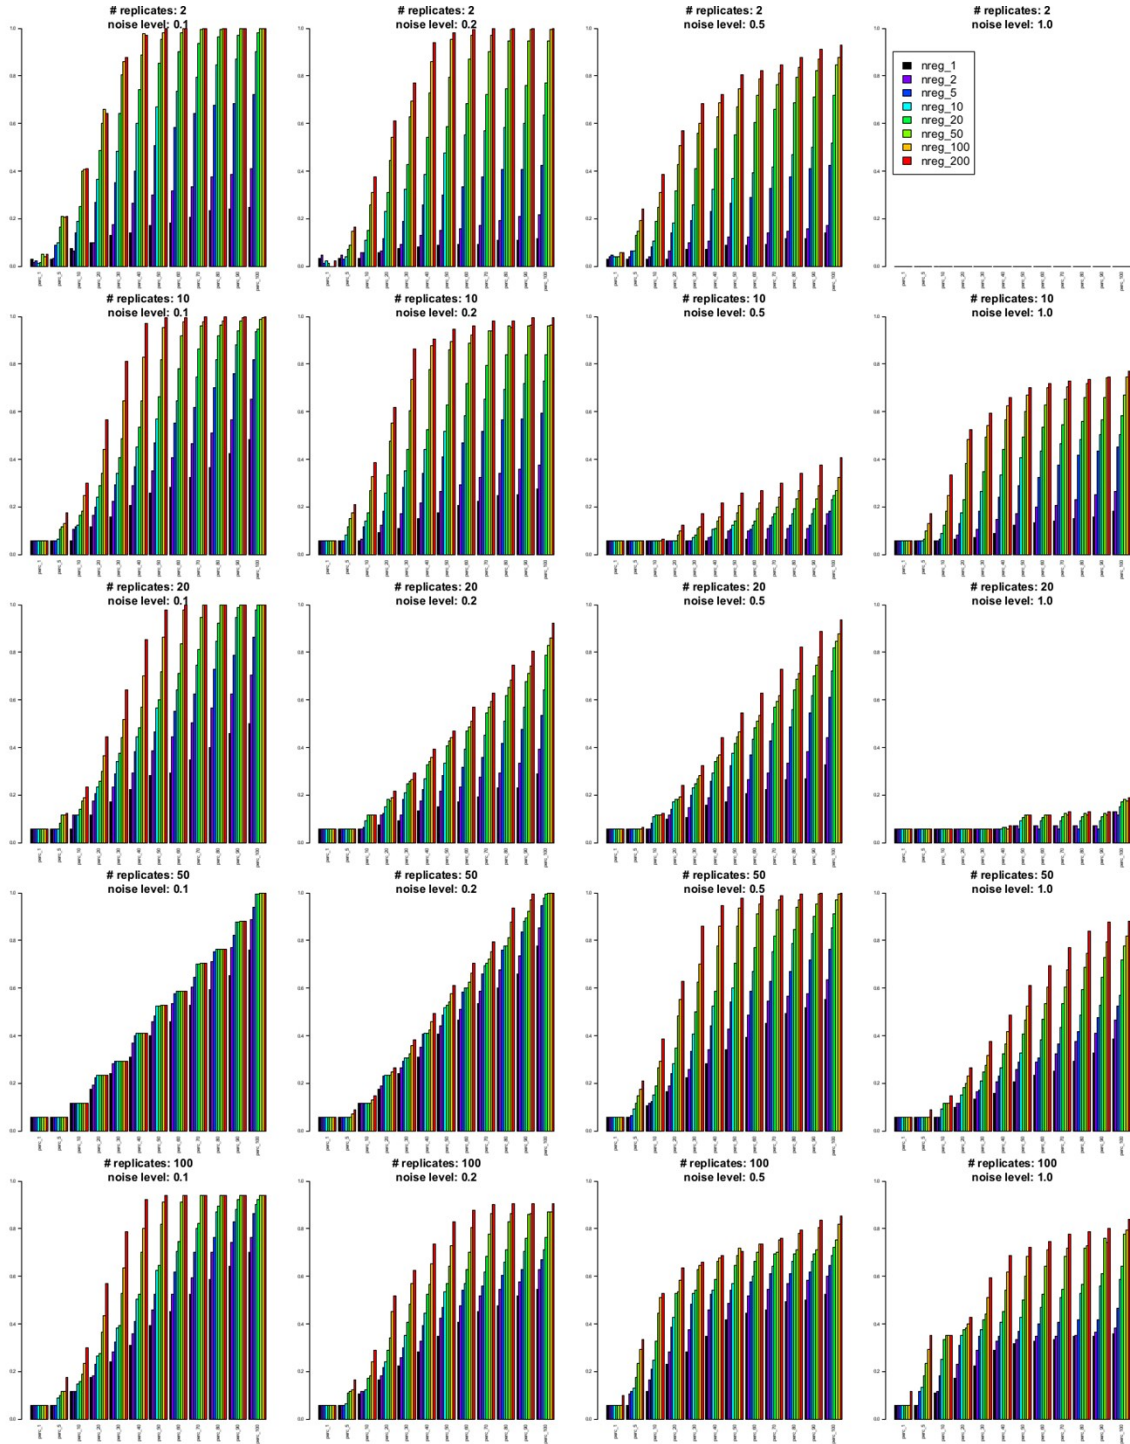

**Fig S4-4. TPR dependence of regulators assignment.** Rows  $bn$ , columns  $nreplicate$ ; for each subfigure, x-axis  $perc$ , y-axis TPR, colors  $nreg$ .

In general, Fig S4-4 shows the trend that TPR increases with  $nreg$  and  $perc$ , while decreases with  $bn$ , except for a few datasets with high noise. However, LemonTree's default  $perc$  (1%) generally has a poor TPR ( $< 0.2$ ). Therefore we recommend users to increase  $perc$  for the sake of a better sensitivity.

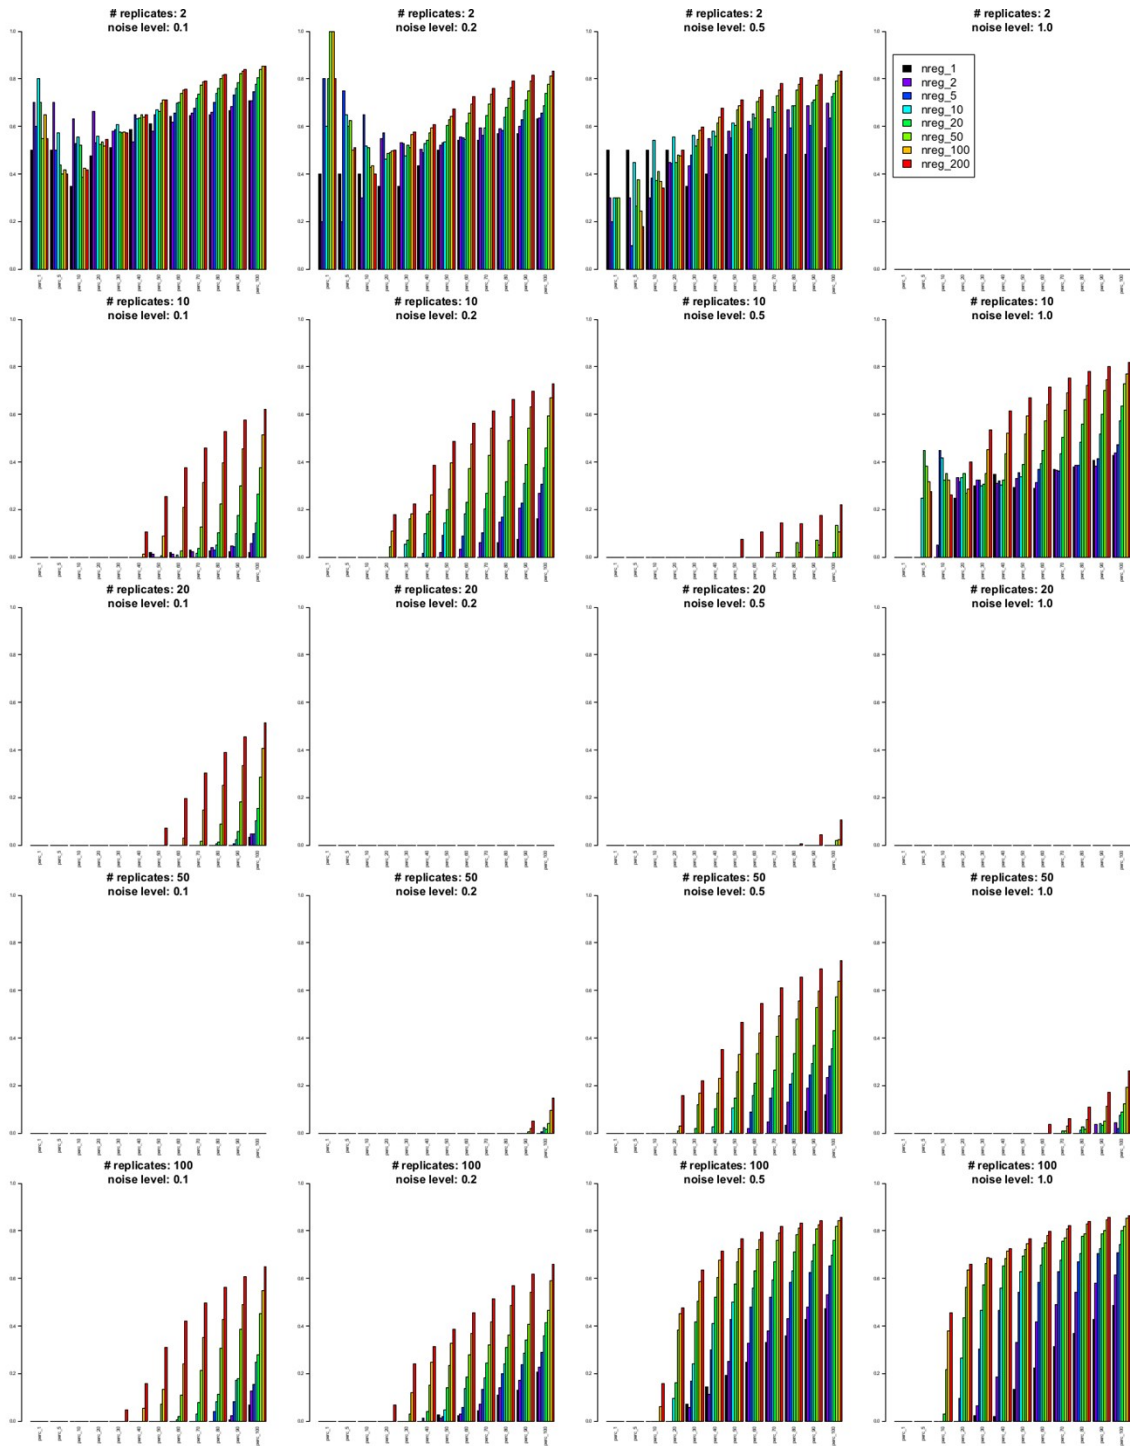

**Fig S4-5. FDR dependence of regulators assignment.** Rows  $bn$ , columns  $nreplicate$ ; for each subfigure,  $x$ -axis  $perc$ ,  $y$ -axis FDR, colors  $nreg$ .

Figure S4-5 shows the TPR-FDR trends that given the same sensitivity FDR generally increases with noise level, and decreases with sample size. Such pattern fades when the noise gets

heavier or *nreplicate* reaches 100. We note that for datasets with limited sample size (*nreplicate* = 2), FDR is constantly high, even with the most stringent *perc* (= 1%).

## Reference

Sing, T. *et al.* (2005) ROCr: visualizing classifier performance in R. *Bioinforma. Oxf. Engl.*, **21**, 3940–3941.
